# Supplementary material for: Interstitial-fluid shear stresses induced by vertically oscillating head motion lower blood pressure in hypertensive rats and humans
Source: PubMed Central journal article supplement (PMC10651490; doi:10.1038/s41551-023-01061-x), 2023-07-06
Supplement: 41551_2023_1061_MOESM1_ESM.pdf [file 41551_2023_1061_MOESM1_ESM.pdf]

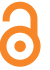

---

# **Interstitial-fluid shear stresses induced by vertically oscillating head motion lower blood pressure in hypertensive rats and humans**

---

In the format provided by the authors and unedited

## Contents

1. Supplementary Figure 1 | Hydrogel introduction in the RVLM does not affect the pressor and depressor responses to AngII and valsartan, respectively, in SHRSPs.
2. Supplementary Figure 2 | Hydrogel introduction to the RVLM eliminates the antihypertensive effect of treadmill running in SHRSPs.
3. Supplementary Figure 3 | Hydrogel introduction does not affect the cell number/apoptosis, the expression of pro-inflammatory cytokines, and the pressure in the RVLM of SHRSPs.
4. Supplementary Figure 4 | BP, HR, and aortic depressor nerve activity (ADNA) remain unchanged during the transition from before to after the initiation of PHM in SHRSPs.
5. Supplementary Figure 5 | Vertically oscillating chair that reproduces the mechanical accelerations in the head during light jogging, and the design and results of protocol 1 as a pilot study to examine antihypertensive effect of VOCR in hypertensive adult humans.
6. Supplementary Figure 6 | Design and blood test results of the human study of protocol 2.
7. Supplementary Figure 7 | Design of the human study of protocol 3, and sex-segregated analysis of BP and HR in protocols 2 and 3.
8. Supplementary Figure 8 | Schematic representation of the antihypertensive effects observed in PHM of hypertensive rats and VOCR of hypertensive humans.
9. Supplementary Table 1 | Calculation of the magnitude of PHM-generated FSS on rat RVLM cells.

10. Supplementary Table 2 | Information of participants in the human studies of protocol 1 and 2.
11. Supplementary Table 3 | Information of participants in the study of protocol 3.
12. Description of Supplementary Videos
13. References
14. Supplementary Data 1 | Uncropped blots for Supplementary Figure 3h.
15. Information of Statistical Analyses

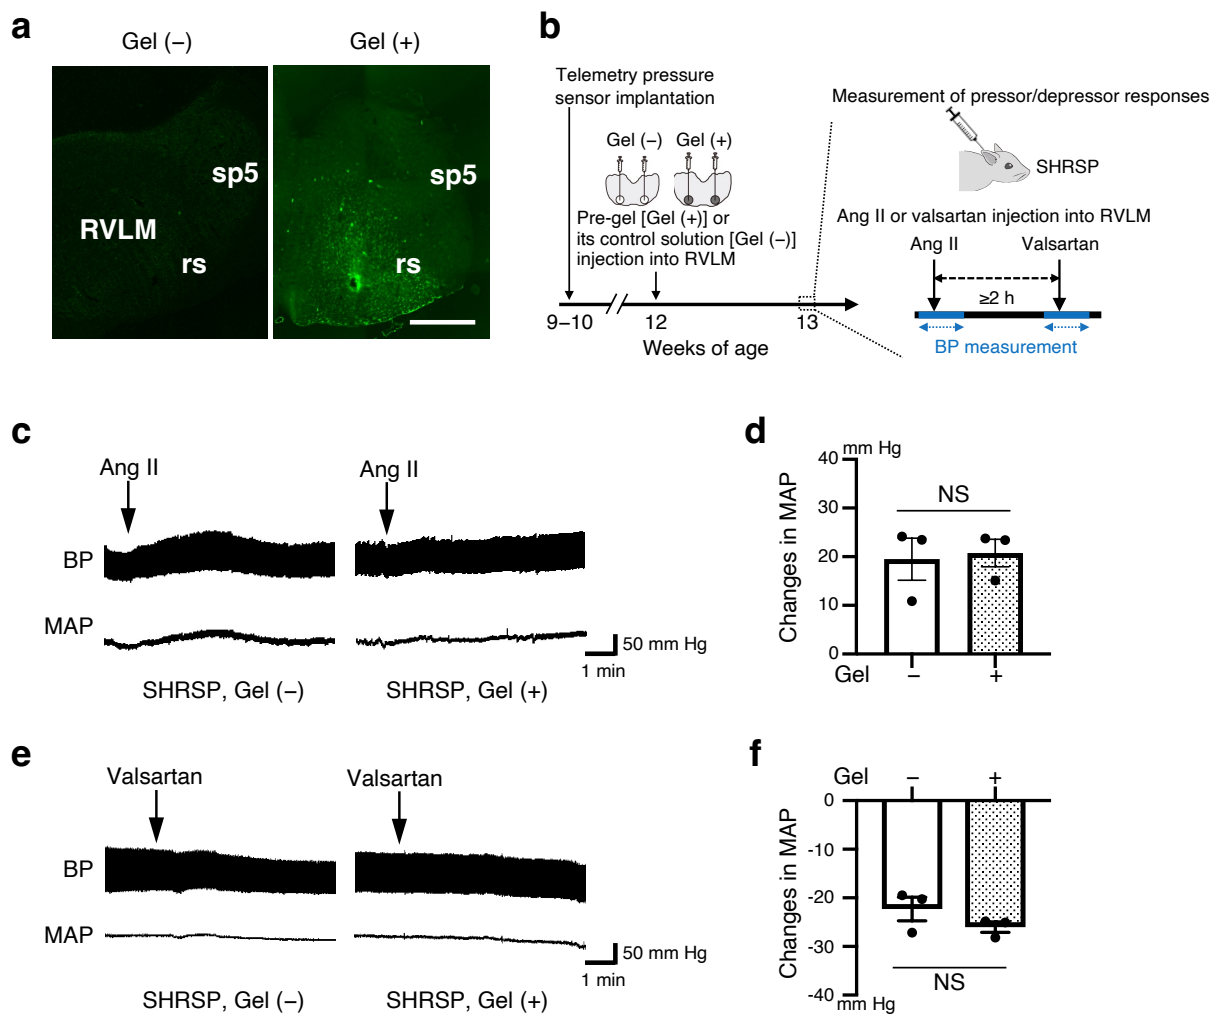

**Supplementary Fig. 1 | Hydrogel introduction in the RVLM does not affect the pressor and**

**depressor responses to AngII and valsartan, respectively, in SHRSPs. a,** Introduction of the

PEG hydrogel in the rat RVLM. Twenty-four hours after the injection of control ungelatable

fluorescent PEG solution (left) or one week after the injection of pre-gel fluorescent PEG

solution (right), brainstem samples were prepared. Coronal-section images representative of

three rats with similar results are shown. Scale bar, 1 mm. **b–f,** Pressor and depressor responses

analyzed one week after the injection of pre-gel PEG solution or its ungelatable control. **(b)**

Schematic representation of the experimental protocol. Pressor and depressor responses were

analyzed as in Fig. 2. **(c–f)** Representative trajectories **(c,e)** and quantification **(d,f)** of the BP ascent upon AngII injection **(c,d)** and descent upon valsartan injection **(e,f)** to the RVLM of SHRSPs with or without the hydrogel introduction (**d**:  $P = 0.8226$ . **f**:  $P = 0.2342$ .  $n = 3$  rats for each group). Right-angled scale bars, 1 min / 50 mm Hg. Data are presented as mean  $\pm$  s.e.m. NS, not significant; unpaired two-tailed Student's  $t$ -test.

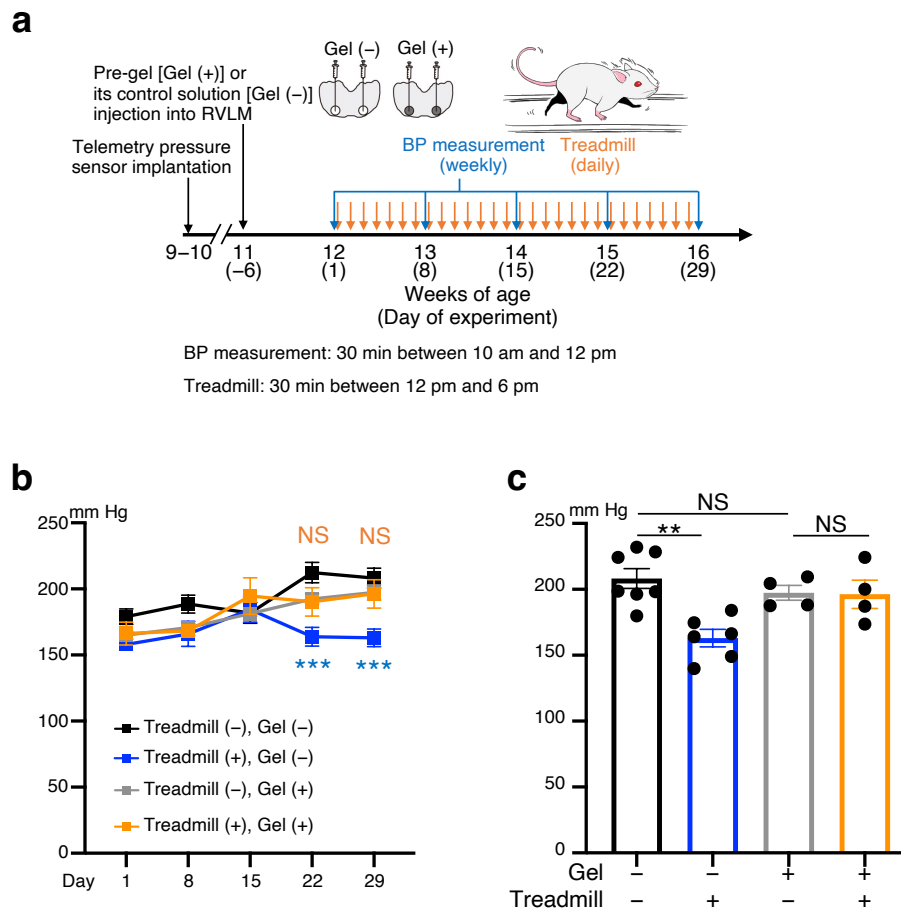

**Supplementary Fig. 2 | Hydrogel introduction to the RVLM eliminates the**

**antihypertensive effect of treadmill running in SHRSPs. a**, Schematic representation of the

experimental protocol to analyze the effects of treadmill running on the BP in SHRSPs. **b,c**,

Time courses (**b**) and values on Day 29 (**c**) of MAP in SHRSPs with (**b**: gray and orange lines,

**c**: columns 3 and 4) and without (**b**: black and blue lines, **c**: columns 1 and 2) the hydrogel

introduction, subjected to either daily treadmill running (30 min/day, 28 days; **b**: blue and

orange lines, **c**: columns 2 and 4) or its control (placing on the belt without turning on the

treadmilling; **b**: black and gray lines, **c**: columns 1 and 3) [**b**, black vs. blue:  $P > 0.9999$  for Day

15,  $P = 0.0001$  for Day 22,  $P = 0.0004$  for Day 29; gray vs. orange:  $P > 0.9999$  for Day 15, Day

22, and Day 29. **c**:  $P = 0.0015$  for column 1 vs. 2,  $P = 0.9997$  for column 3 vs. 4,  $P = 0.7751$  for column 1 vs. 3.  $n = 7$  rats for treadmill (-)/Gel (-);  $n = 6$  rats for treadmill (+)/Gel (-);  $n = 4$  rats for each group of Gel (+)]. Data are presented as mean  $\pm$  s.e.m.  $**P < 0.01$ ,  $***P < 0.001$ ; NS, not significant; two-way repeated measures ANOVA with Bonferroni's post hoc comparisons test (**b**) or one-way ANOVA with Tukey's post hoc multiple comparisons test (**c**).

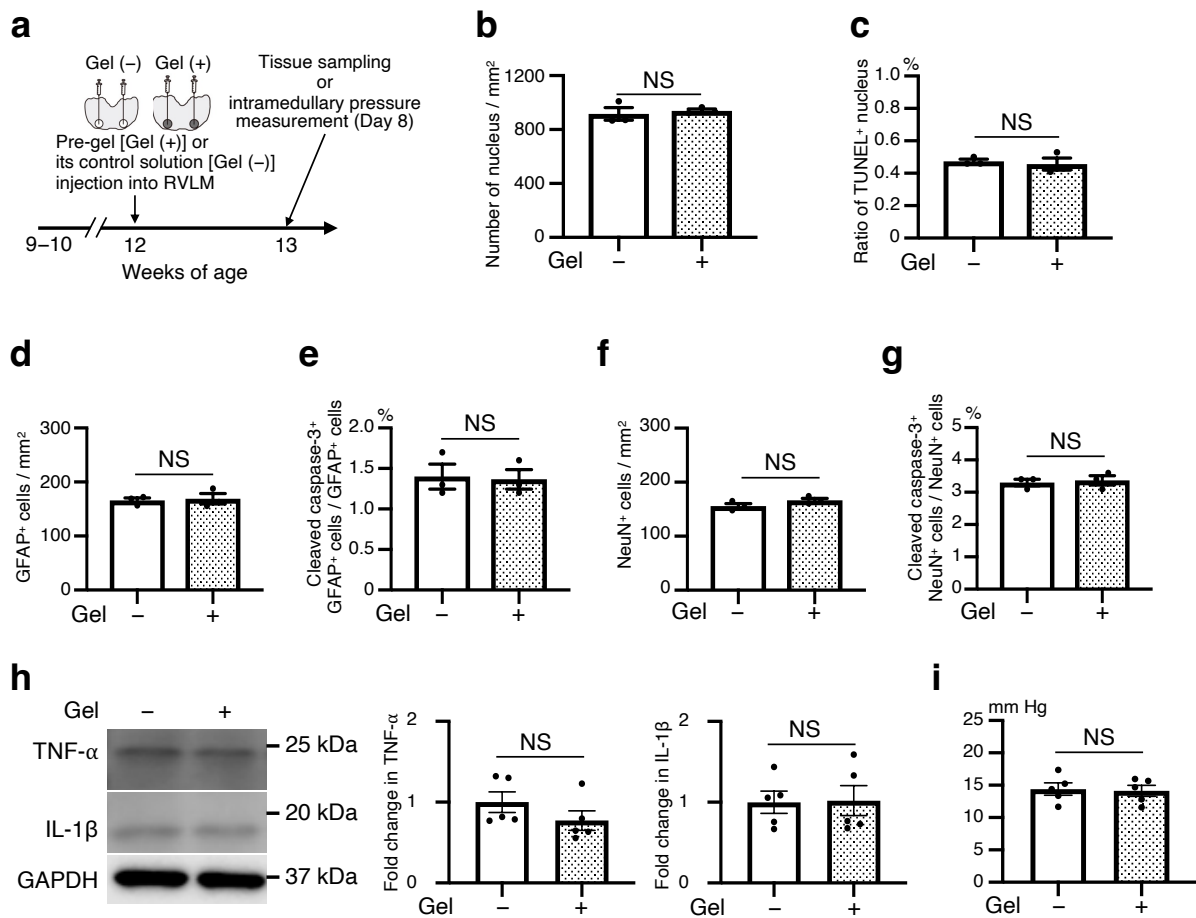

**Supplementary Fig. 3 | Hydrogel introduction does not affect the cell number/apoptosis, the expression of pro-inflammatory cytokines, and the pressure in the RVLM of SHRSPs.**

**a**, Schematic representation of the experimental protocol to analyze the hydrogel-introduced RVLM in SHRSPs. **b–g**, Effects of hydrogel introduction on the survival (**b,d,f**) and apoptosis (**c,e,g**) of total cells (**b,c**), astrocytes (**d,e**), and neurons (**f,g**) in the RVLM of SHRSPs. Fixed rat RVLM sections were subjected to TUNEL assay (**b,c**), or combinations of anti-GFAP for glial fibrillar acidic protein-positive astrocytes, anti-NeuN for mature neurons, and anti-cleaved caspase-3 for apoptotic cells immunostaining (**e–g**). DAPI-positive nuclei (**b**), GFAP- (**d**) or NeuN- (**f**) positive cells were counted, and the relative populations of cells doubly positive for



indicated combinations of TUNEL (**c**) and cleaved caspase-3 (**e,g**) were quantified. Each value in (**b–g**) represents an average from five images of 1 x 1-mm area analyzed for each rat. **h**, Expression of TNF- $\alpha$  and IL-1 $\beta$  in SHRSPs' RVLM with and without the hydrogel introduction. Anti-TNF- $\alpha$ , anti-IL-1 $\beta$ , and anti-GAPDH immunoblots of samples prepared from two individual rats with (lane 2) and without (lane 1) hydrogel introduction (left). Expressions of TNF- $\alpha$  (center) and IL-1 $\beta$  (right) were normalized against GAPDH expression, and scaled with the mean values of the control samples [Gel (-)] set as 1. **i**, Intramedullary pressure of SHRSPs with and without the hydrogel introduction in their RVLM. The intramedullary pressure was measured as in Fig. 4a–d, and the mean value was obtained from 30-s steady-state continuous measurement for each rat (**b**:  $P = 0.6518$ . **c**:  $P = 0.6943$ . **d**:  $P = 0.7938$ . **e**:  $P = 0.8722$ . **f**:  $P = 0.1679$ . **g**:  $P = 0.7247$ . **h**:  $P = 0.2312$  for TNF- $\alpha$ ,  $P = 0.9342$  for IL-1 $\beta$ . **i**:  $P = 0.8433$ . **b–g**:  $n = 3$  rats for each group. **h,i**:  $n = 5$  rats for each group). Data are presented as mean  $\pm$  s.e.m. NS, not significant; unpaired two-tailed Student's  $t$ -test (**b–i**).

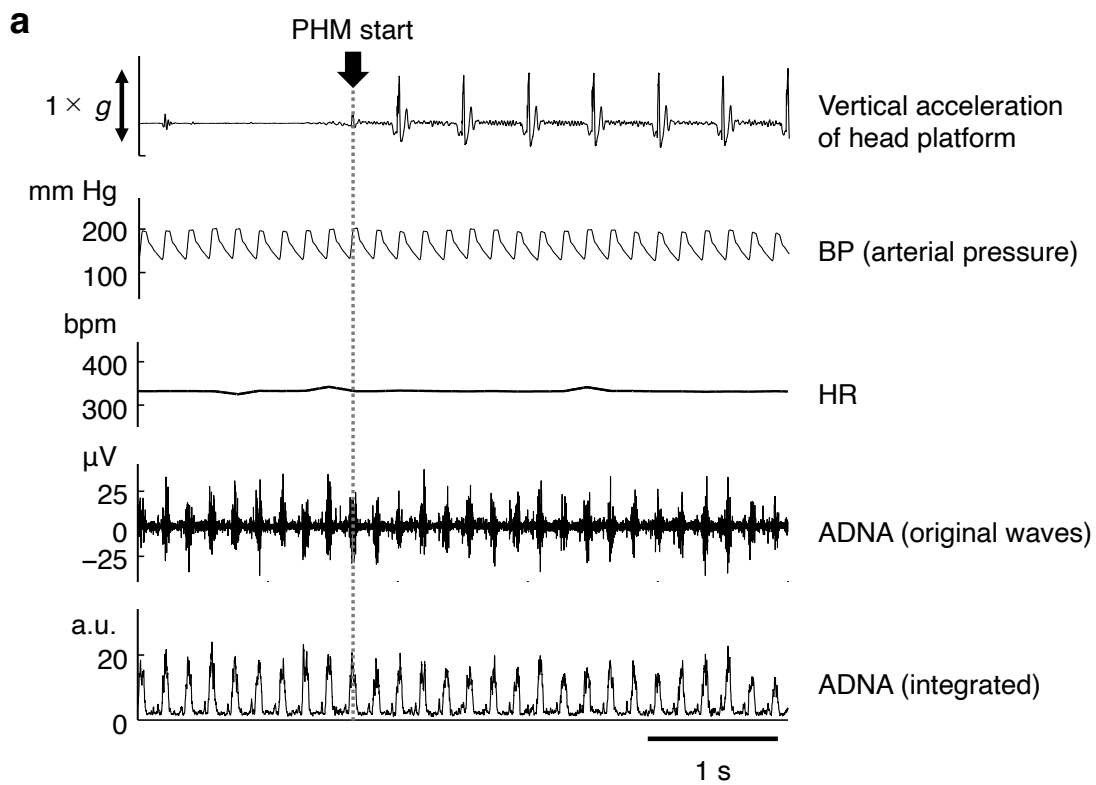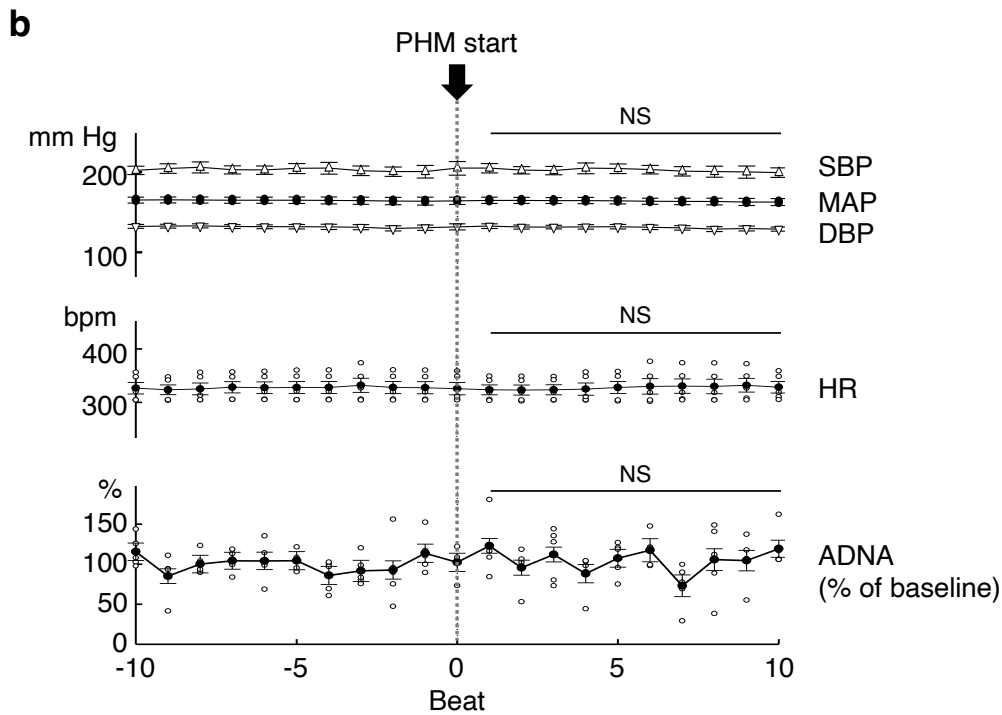

**Supplementary Fig. 4 | BP, HR, and aortic depressor nerve activity (ADNA) remain**

**unchanged during the transition from before to after the initiation of PHM in SHRSPs. a,**

BP, HR, and ADNA in 12–16-week-old male SHRSPs monitored and recorded simultaneously

with vertical accelerations of the oscillating PHM platform. Integrated ADNA was normalized in each rat and is presented in arbitrary units (a.u.) (see Methods). Data shown represent five biologically independent experiments using five different SHRSPs with similar results. **b**, Beat-by-beat BP (SBP, MAP, and DBP), HR, and ADNA. The beat that elicited SBP immediately before the PHM initiation was defined as “beat 0”. Statistical analysis was conducted against the mean values of beat -9 to beat 0 ( $n = 5$  rats). Data are presented as mean  $\pm$  s.e.m. NS, not significant; one-way repeated measures ANOVA with Dunnett’s multiple comparisons test. Arrows and dotted lines in **(a,b)** indicate the time point of PHM initiation. Details of statistical analyses are provided in the Information of Statistical Analyses section.

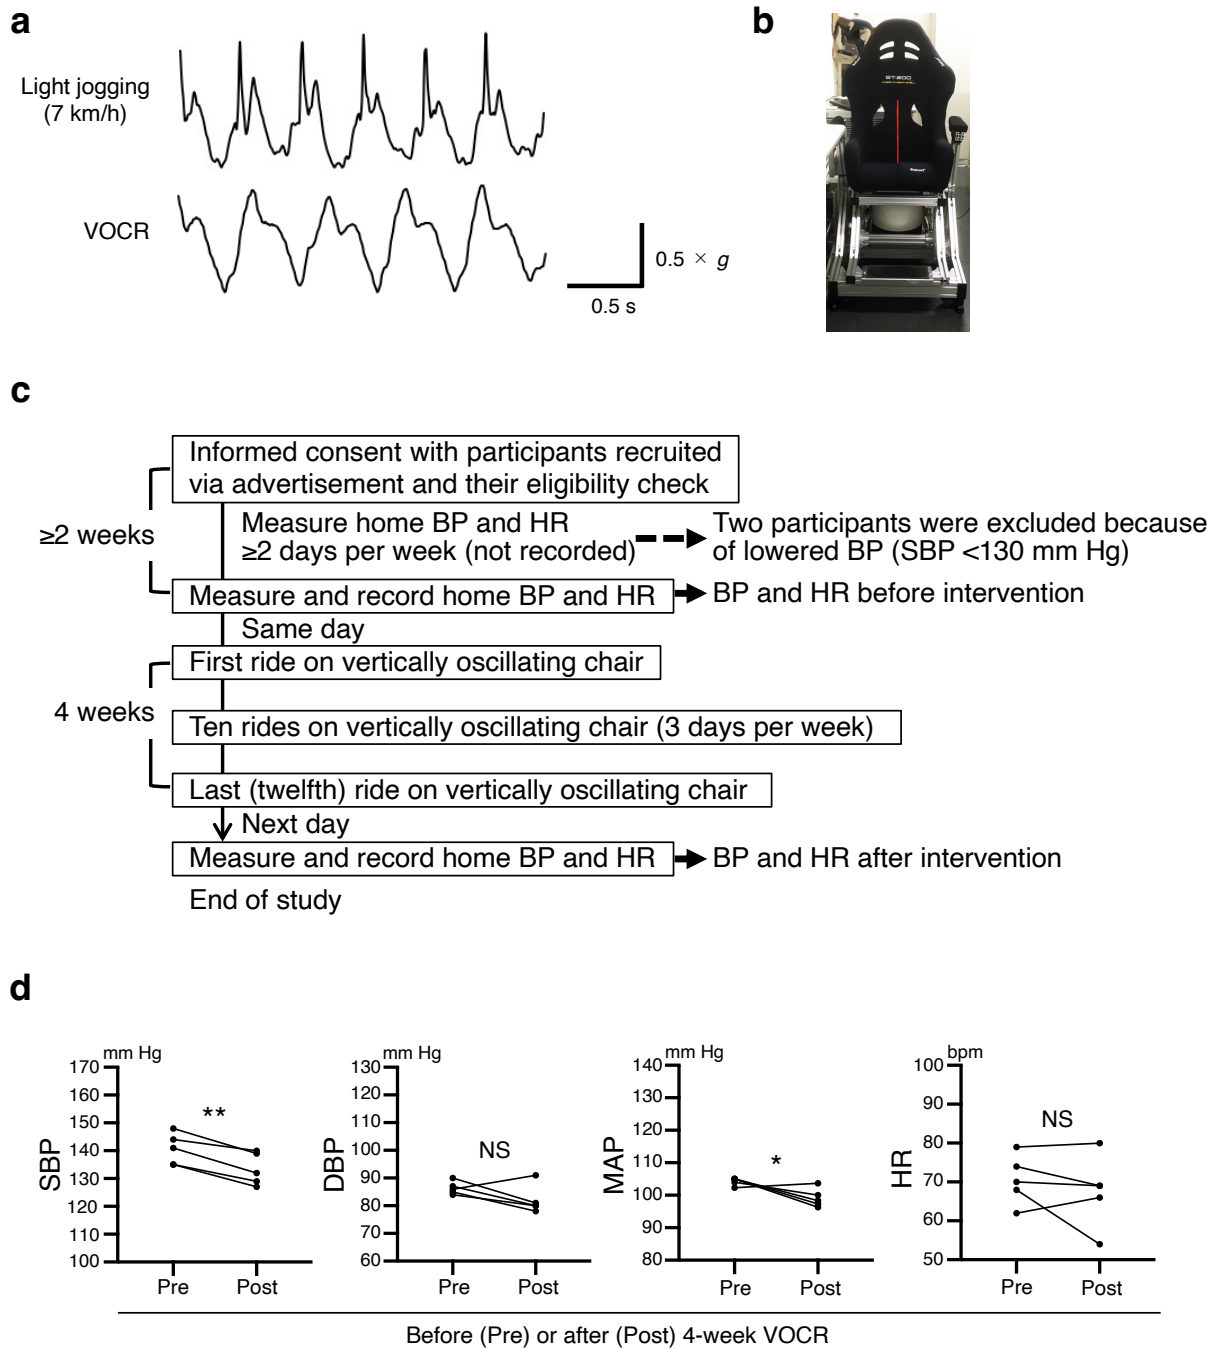

**Supplementary Fig. 5 | Vertically oscillating chair that reproduces the mechanical accelerations in the head during light jogging, and the design and results of protocol 1 as a pilot study to examine antihypertensive effect of VOCR in hypertensive adult humans. a,** Vertical accelerations generated at adult human head during light jogging on a treadmill machine (velocity: 7 km/h) and VOCR (frequency: 2 Hz). The VOCR system was adjusted to

produce  $\sim 1.0 \times g$  vertical acceleration peaks. Right-angled scale bar,  $0.5 \text{ s} / 0.5 \times g$ . Images are representative of three biologically independent experiments with similar results. **b**, Photograph of the chair. **c**, Schematic representation of protocol 1. **d**, From left to right, SBP, DBP, MAP, and HR “value of the day”s immediately before and after 4-week VOXR in the study of protocol 1 (SBP:  $P = 0.0018$ . DBP:  $P = 0.1509$ . MAP:  $P = 0.0459$ . HR:  $P = 0.3900$ .  $n = 5$ ).  $*P < 0.05$ ;  $**P < 0.01$ ; NS, not significant; paired two-tailed Student’s  $t$ -test.

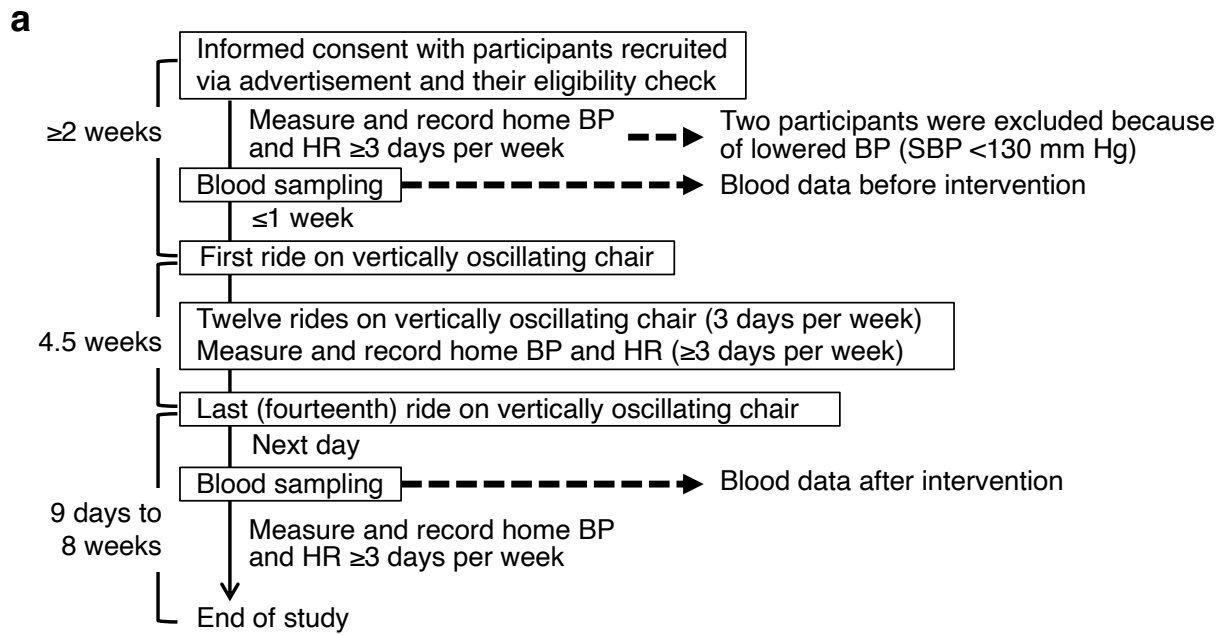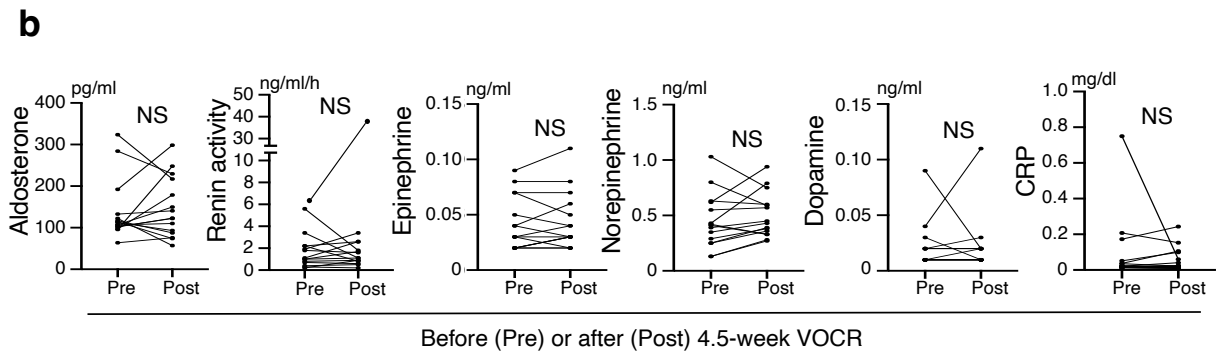

**Supplementary Fig. 6 | Design and blood test results of the human study of protocol 2. a,**

Schematic representation of protocol 2. **b,** Blood test values before and after the intervention

period (from left to right, aldosterone, renin activity, epinephrine, norepinephrine, dopamine,

and CRP). Significant change was not observed in any of tested parameters. NS, not significant;

paired two-tailed Student's *t*-test (Aldosterone:  $P = 0.6265$ . Renin activity:  $P = 0.3794$ .

Epinephrine:  $P = 0.5103$ . Norepinephrine:  $P = 0.2653$ . Dopamine:  $P > 0.9999$ . CRP:  $P =$

0.4412.  $n = 15$ ). A participant (participant #18) showed a large increase in plasma renin activity

after VOICR. We advised him to consult his primary care physician, who ruled out the

disqualifying conditions for this study (e.g., severe renal disease; see Methods) based on comprehensive evaluation. Therefore, we did not exclude participant #18 from our statistical analysis of BP and HR.

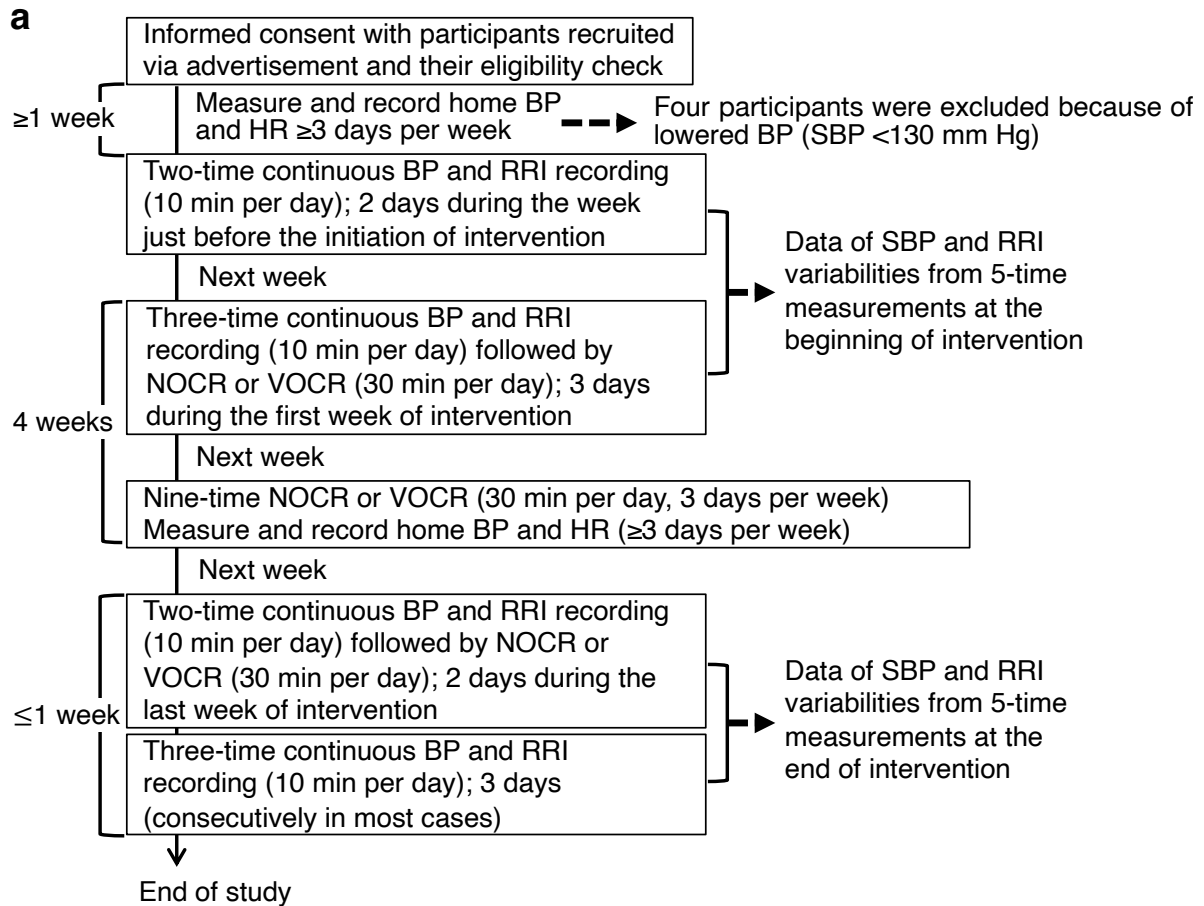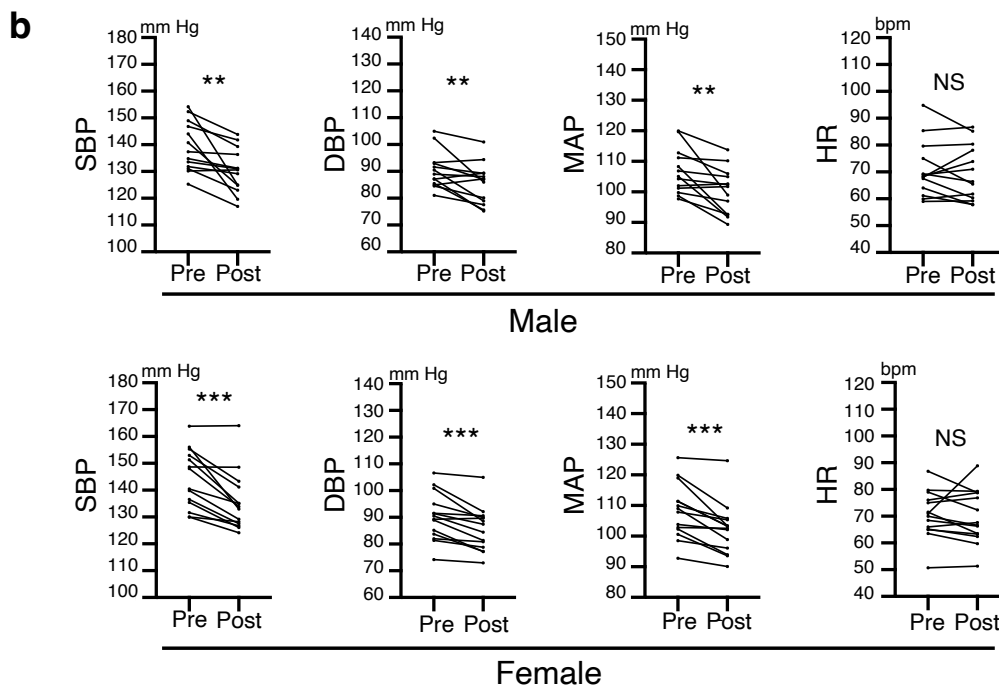

**Supplementary Fig. 7 | Design of the human study of protocol 3, and sex-segregated analysis of BP and HR in protocols 2 and 3. a, Schematic representation of protocol 3. b,**



From left to right, SBP, DBP, MAP, and HR “value of the week”s immediately before and after 4.5-week VOCR in the study of protocols 2 and 3. To avoid duplicate inputs, the VOCR data from participants #22 and #31 in protocol 3, who were participants #15 and #7 in protocol 2 (see Supplementary Table 3), were excluded from this analysis (male, SBP:  $P = 0.0033$ . DBP:  $P = 0.0094$ . MAP:  $P = 0.0046$ . HR:  $P = 0.4373$ .  $n = 13$ ; female, SBP:  $P = 0.0002$ . DBP:  $P = 0.0005$ . MAP:  $P = 0.0003$ . HR:  $P = 0.6257$ .  $n = 14$ ). \*\* $P < 0.01$ ; \*\*\* $P < 0.001$ ; NS, not significant; paired two-tailed Student’s  $t$ -test.

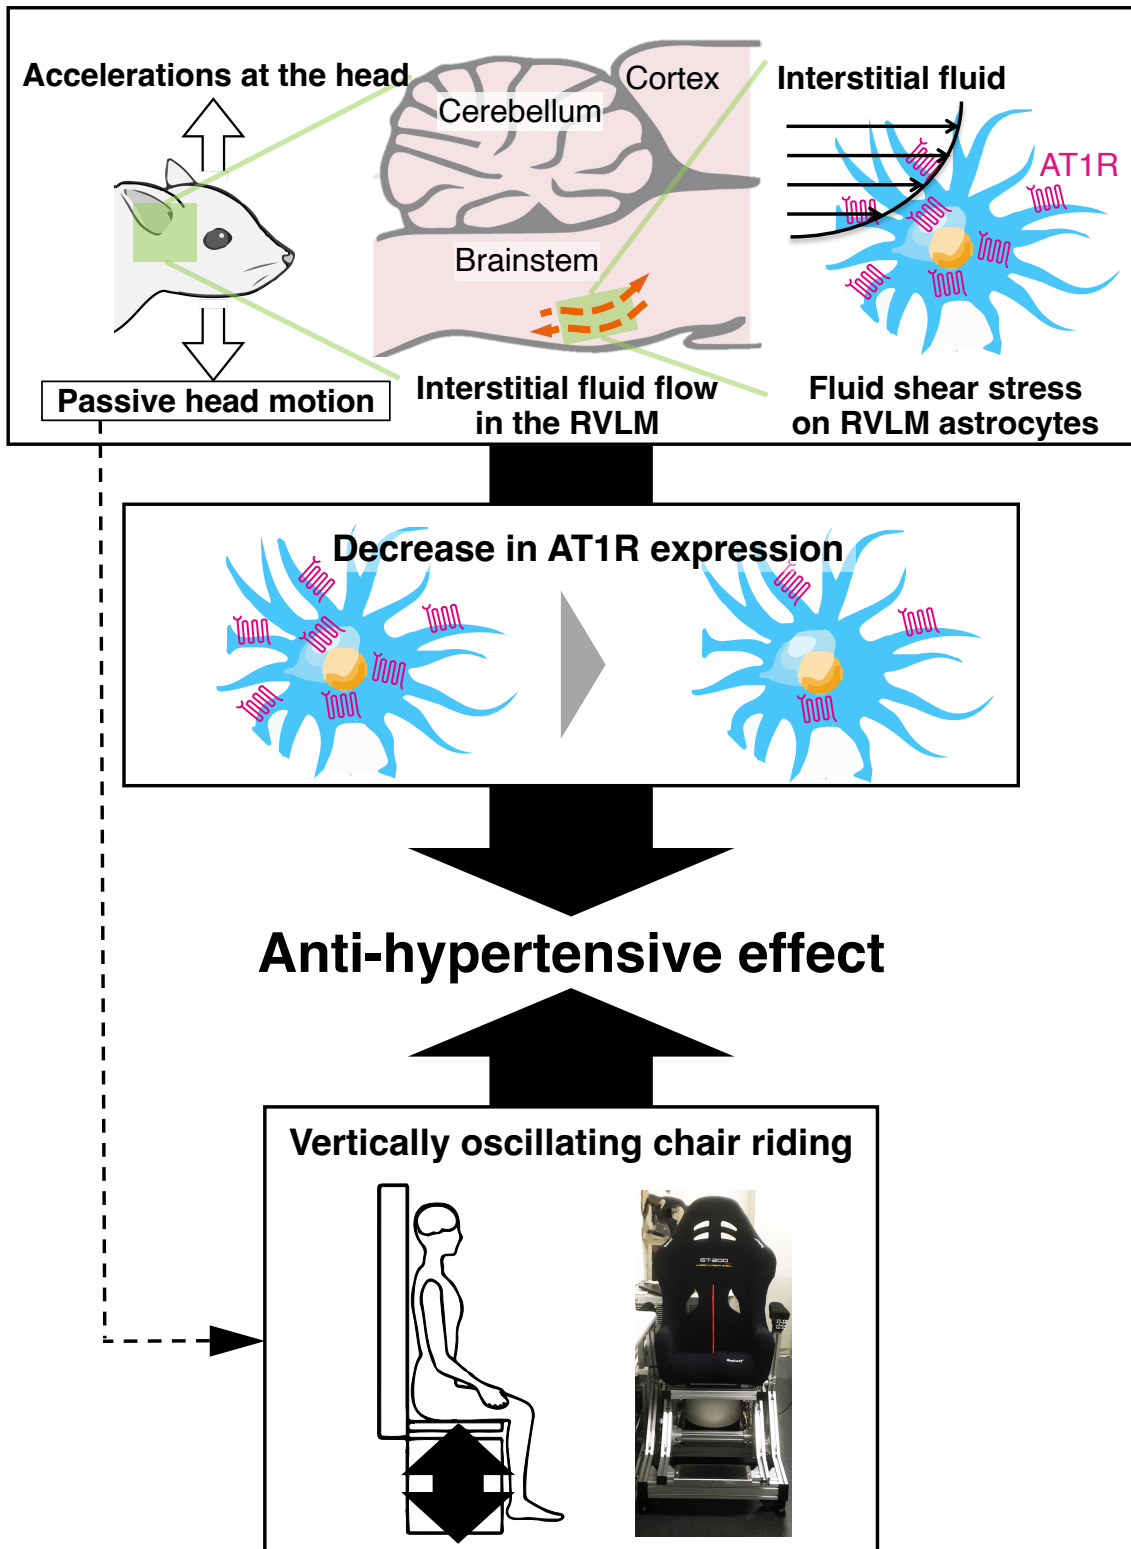

**Supplementary Fig. 8 | Schematic representation of the antihypertensive effects observed in PHM of hypertensive rats and VOCCR of hypertensive humans. The results from our**

animal experiments indicate that cyclical application of mechanical intervention to the head generates interstitial fluid movement in the RVLM, leading to FSS-induced decrease in the AT1R expression in astrocytes in situ, and thereby ameliorates hypertension. Our studies also show that the VOCR of hypertensive adult humans, which produces vertical accelerations at their heads, lowers their BP.

**a**

| Property                                                              | Value     |
|-----------------------------------------------------------------------|-----------|
| Porosity ( $\epsilon$ )                                               | 0.2 (20%) |
| Diameter of interstitial space ( $D_p$ ; $\mu\text{m}$ )              | 0.10–0.48 |
| Kozeny constant ( $k$ )                                               | 4.5–5.5   |
| Viscosity of interstitial fluid ( $\mu$ ; $\text{mPa}\cdot\text{s}$ ) | 0.72      |
| Velocity of interstitial fluid movement (flow) ( $\mu\text{m/s}$ )    | 0.4–0.6   |

**b**

FSS ( $\tau_x$ ) at the cell surface:

$$\tau = \frac{\mu u_\infty}{\sqrt{K_p}}$$

$$K_p = \frac{D_p^2 \epsilon^3}{36k(1 - \epsilon)^2}$$

, where  $K_p$  is the Darcy permeability in the brain (RVLM).

When the values listed in **a** are introduced in these equations, the Darcy permeability is calculated as  $6.63 \times 10^{-19} - 1.45 \times 10^{-17} \text{ m}^2$ , and the magnitude of FSS is estimated as **0.076–0.53 Pa**.

### Supplementary Table 1 | Calculation of the magnitude of PHM-generated FSS on rat

**RVLM cells. a**, Values referenced for calculation of the magnitude of FSS that PHM generated

in the rat RVLM. Based on the estimated structure of the interstitial space in the rat RVLM

(Extended Data Fig. 6e and Extended Data Fig. 7d), we referenced 4.5–5.5 as the Kozeny

constant<sup>1-3</sup> to calculate the Darcy permeability (see Methods). Because the velocity of interstitial

fluid movement has been reported to be  $\sim 0.2 \mu\text{m/s}$  in sedentary rats<sup>4</sup> and mice<sup>5</sup>, we entered 0.4–

0.6  $\mu\text{m/s}$  as its value during PHM, based on our interpretation of the  $\mu\text{CT}$  study (i.e., two- to three-fold increase in velocity; Fig. 4g,h). The property of the interstitial fluid in the brain, whose composition is similar to that of the cerebrospinal fluid (CSF)<sup>6</sup>, was referenced from previous studies describing the viscosity of human CSF<sup>7,8</sup>. The diameter of the individual interstitial space was referenced from the values of the cross-sectional area of the interstitial space as shown in Extended Data Fig. 7c. **b**, Calculation of the magnitude of FSS generated by PHM. The Darcy permeability ( $K_p$ ) is calculated as  $6.63 \times 10^{-19} - 1.45 \times 10^{-17} \text{ m}^2$ . Following the calculation reported previously<sup>9</sup>, the magnitude of FSS ( $\tau$ ) at the cell surface is estimated as 0.076–0.53 Pa.

| Participant # | Sex              | Period since diagnosis or self-recognition as hypertension    | Smoking                     | Current medication (dose per day)                                                                         | Habitual exercise (times per week)                            | SBP/DBP (mm Hg) and HR (bpm) just before (left) and after (right) VOCCR period (month of first - last bout of VOCCR) |        |
|---------------|------------------|---------------------------------------------------------------|-----------------------------|-----------------------------------------------------------------------------------------------------------|---------------------------------------------------------------|----------------------------------------------------------------------------------------------------------------------|--------|
|               | Age (years)      | Declared health problems and diseases other than hypertension | Alcohol (if yes, how often) |                                                                                                           |                                                               |                                                                                                                      |        |
|               | Body weight (kg) |                                                               |                             |                                                                                                           |                                                               |                                                                                                                      |        |
|               | Height (cm)      |                                                               |                             |                                                                                                           |                                                               |                                                                                                                      |        |
|               | BMI              |                                                               |                             |                                                                                                           |                                                               |                                                                                                                      |        |
| 1             | Male             | 13 years                                                      | No                          | Azilsartan · Amlodine (20 mg · 5 mg)<br>Febuxostat (10 mg)<br>Bisoprolol fumarate (5 mg)                  | Walking<br>90 min<br>(3 or 4 times)                           | 148/85                                                                                                               | 139/78 |
|               | 60               |                                                               |                             |                                                                                                           |                                                               | 62                                                                                                                   | 66     |
|               | 73               |                                                               |                             |                                                                                                           |                                                               | February - March                                                                                                     |        |
|               | 165.2            |                                                               |                             |                                                                                                           |                                                               |                                                                                                                      |        |
|               | 27.2             | Hyperuricemia                                                 | Almost every day            |                                                                                                           |                                                               |                                                                                                                      |        |
| 2             | Female           | 14 years                                                      | No                          | None                                                                                                      | Sit-ups 2 x 30 times<br>(every day)                           | 135/90                                                                                                               | 127/81 |
|               | 53               |                                                               |                             |                                                                                                           |                                                               | 70                                                                                                                   | 69     |
|               | 50               |                                                               |                             |                                                                                                           |                                                               | March                                                                                                                |        |
|               | 159              |                                                               |                             |                                                                                                           |                                                               |                                                                                                                      |        |
|               | 19.8             | None                                                          | Almost every day            |                                                                                                           |                                                               |                                                                                                                      |        |
| 3             | Male             | 19 years                                                      | No                          | None                                                                                                      | Judo<br>(once)                                                | 135/86                                                                                                               | 129/91 |
|               | 37               |                                                               |                             |                                                                                                           |                                                               | 68                                                                                                                   | 54     |
|               | 113              |                                                               |                             |                                                                                                           |                                                               | March                                                                                                                |        |
|               | 186              |                                                               |                             |                                                                                                           |                                                               |                                                                                                                      |        |
|               | 32.7             | None                                                          | Occasionally                |                                                                                                           |                                                               |                                                                                                                      |        |
| 4             | Female           | 6 years                                                       | No                          | None                                                                                                      | None                                                          | 141/87                                                                                                               | 132/80 |
|               | 60               |                                                               |                             |                                                                                                           |                                                               | 79                                                                                                                   | 80     |
|               | 73               |                                                               |                             |                                                                                                           |                                                               | April - May                                                                                                          |        |
|               | 156              |                                                               |                             |                                                                                                           |                                                               |                                                                                                                      |        |
|               | 30               | None                                                          | Occasionally                |                                                                                                           |                                                               |                                                                                                                      |        |
| 5             | Female           | 1 year                                                        | No                          | Azilsartan (20 mg)<br>Amlodine (2.5 mg)                                                                   | None                                                          | 144/84                                                                                                               | 140/80 |
|               | 52               |                                                               |                             |                                                                                                           |                                                               | 74                                                                                                                   | 69     |
|               | 50               |                                                               |                             |                                                                                                           |                                                               | April - May                                                                                                          |        |
|               | 148              |                                                               |                             |                                                                                                           |                                                               |                                                                                                                      |        |
|               | 22.8             | None                                                          | Occasionally                |                                                                                                           |                                                               |                                                                                                                      |        |
| 6             | Female           | 10 years                                                      | No                          | None                                                                                                      | None                                                          | 130/74                                                                                                               | 124/73 |
|               | 57               |                                                               |                             |                                                                                                           |                                                               | 79                                                                                                                   | 72     |
|               | 68               |                                                               |                             |                                                                                                           |                                                               | November - December                                                                                                  |        |
|               | 164              |                                                               |                             |                                                                                                           |                                                               |                                                                                                                      |        |
|               | 25.3             | None                                                          | Occasionally                |                                                                                                           |                                                               |                                                                                                                      |        |
| 7             | Male             | Uncertain (<1 year)                                           | No                          | Metformin hydrochloride (1000 mg)<br>Rosuvastatin calcium (5 mg)<br>Sitagliptin phosphate hydrate (50 mg) | Walking<br>120 min<br>(once)                                  | 137/92                                                                                                               | 136/89 |
|               | 61               |                                                               |                             |                                                                                                           |                                                               | 85                                                                                                                   | 87     |
|               | 67               |                                                               |                             |                                                                                                           |                                                               | November - December                                                                                                  |        |
|               | 168              |                                                               |                             |                                                                                                           |                                                               |                                                                                                                      |        |
|               | 23.7             | Diabetes mellitus<br>Hyperlipidemia                           | No                          |                                                                                                           |                                                               |                                                                                                                      |        |
| 8             | Male             | 3 months                                                      | Yes                         | Montelukast sodium (10 mg)<br>Ebastine (10 mg)                                                            | Walking<br>60 min<br>(once)<br>Stretching<br>30 min<br>(once) | 125/86                                                                                                               | 117/76 |
|               | 46               |                                                               |                             |                                                                                                           |                                                               | 68                                                                                                                   | 60     |
|               | 72               |                                                               |                             |                                                                                                           |                                                               | November - December                                                                                                  |        |
|               | 178              |                                                               |                             |                                                                                                           |                                                               |                                                                                                                      |        |
|               | 22.7             | Allergic rhinitis                                             | Occasionally                |                                                                                                           |                                                               |                                                                                                                      |        |
| 9             | Male             | 7 months                                                      | No                          | None                                                                                                      | Karate<br>(2 or 3 times)                                      | 150/85                                                                                                               | 146/87 |
|               | 55               |                                                               |                             |                                                                                                           |                                                               | 72                                                                                                                   | 71     |
|               | 87               |                                                               |                             |                                                                                                           |                                                               | November - December                                                                                                  |        |
|               | 173              |                                                               |                             |                                                                                                           |                                                               |                                                                                                                      |        |
|               | 29.1             | Diabetes mellitus                                             | No                          |                                                                                                           |                                                               |                                                                                                                      |        |
| 10            | Male             | 6 months                                                      | No                          | None                                                                                                      | Walking<br>40 min<br>(4 times)                                | 144/91                                                                                                               | 120/79 |
|               | 70               |                                                               |                             |                                                                                                           |                                                               | 80                                                                                                                   | 80     |
|               | 62               |                                                               |                             |                                                                                                           |                                                               | November - December                                                                                                  |        |
|               | 166              |                                                               |                             |                                                                                                           |                                                               |                                                                                                                      |        |
|               | 22.5             | None                                                          | Occasionally                |                                                                                                           |                                                               |                                                                                                                      |        |
| 11            | Female           | Uncertain (>1 year)                                           | No                          | Tamoxifen citrate (20 mg)                                                                                 | None                                                          | 153/91                                                                                                               | 141/84 |
|               | 60               |                                                               |                             |                                                                                                           |                                                               | 72                                                                                                                   | 64     |
|               | 45               |                                                               |                             |                                                                                                           |                                                               | November - December                                                                                                  |        |
|               | 157              |                                                               |                             |                                                                                                           |                                                               |                                                                                                                      |        |
|               | 18.3             | Breast cancer<br>(post-surgery)                               | Almost every day            |                                                                                                           |                                                               |                                                                                                                      |        |
| 12            | Male             | Uncertain (<1 year)                                           | No                          | None                                                                                                      | None                                                          | 134/85                                                                                                               | 131/87 |
|               | 68               |                                                               |                             |                                                                                                           |                                                               | 69                                                                                                                   | 71     |
|               | 72               |                                                               |                             |                                                                                                           |                                                               | January - February                                                                                                   |        |
|               | 171              |                                                               |                             |                                                                                                           |                                                               |                                                                                                                      |        |
|               | 24.6             | None                                                          | No                          |                                                                                                           |                                                               |                                                                                                                      |        |
| 13            | Female           | 7 years                                                       | No                          | Telmisartan · Amlodipine<br>(40 mg · 5 mg)                                                                | None                                                          | 140/95                                                                                                               | 129/90 |
|               | 56               |                                                               |                             |                                                                                                           |                                                               | 66                                                                                                                   | 68     |
|               | 58               |                                                               |                             |                                                                                                           |                                                               | January - February                                                                                                   |        |
|               | 160              |                                                               |                             |                                                                                                           |                                                               |                                                                                                                      |        |
|               | 22.7             | None                                                          | No                          |                                                                                                           |                                                               |                                                                                                                      |        |
| 14            | Male             | Uncertain (<1 year)                                           | No                          | Sitagliptin phosphate hydrate (50 mg)<br>Acetazolamide (250 mg)                                           | None                                                          | 130/85                                                                                                               | 131/80 |
|               | 49               |                                                               |                             |                                                                                                           |                                                               | 95                                                                                                                   | 85     |
|               | 69               |                                                               |                             |                                                                                                           |                                                               | January - February                                                                                                   |        |
|               | 168              |                                                               |                             |                                                                                                           |                                                               |                                                                                                                      |        |
|               | 24.5             | Diabetes mellitus                                             | No                          |                                                                                                           |                                                               |                                                                                                                      |        |

| Participant # | Sex         | Period since diagnosis or self-recognition as hypertension | Smoking | Current medication (dose per day)                                                                                                                           | Habitual exercise (times per week) | SBP/DBP (mm Hg) and HR (bpm) just before (left) and after (right) VOCR period (month of first - last bout of VOCR) |                             |         |
|---------------|-------------|------------------------------------------------------------|---------|-------------------------------------------------------------------------------------------------------------------------------------------------------------|------------------------------------|--------------------------------------------------------------------------------------------------------------------|-----------------------------|---------|
|               | Age (years) |                                                            |         |                                                                                                                                                             |                                    | Declared health problems and diseases other than hypertension                                                      | Alcohol (if yes, how often) |         |
| 15            | Male        | Uncertain (<1 year)                                        | No      | None                                                                                                                                                        | None                               | None                                                                                                               | 141/87                      | 125/75  |
|               | 43          |                                                            |         |                                                                                                                                                             |                                    |                                                                                                                    | 75                          | 64      |
|               | 69          |                                                            |         |                                                                                                                                                             |                                    |                                                                                                                    | August - September          |         |
|               | 165         |                                                            |         |                                                                                                                                                             |                                    |                                                                                                                    |                             |         |
| 16            | Female      | 15 years                                                   | No      | None                                                                                                                                                        | Walking 60 min (6 times)           | None                                                                                                               | 156/101                     | 133/89  |
|               | 48          |                                                            |         |                                                                                                                                                             |                                    |                                                                                                                    | 71                          | 89      |
|               | 45.3        |                                                            |         |                                                                                                                                                             |                                    |                                                                                                                    | October - November          |         |
|               | 157.2       |                                                            |         |                                                                                                                                                             |                                    |                                                                                                                    |                             |         |
| 17            | Male        | 8 years                                                    | Yes     | None                                                                                                                                                        | None                               | None                                                                                                               | 135/89                      | 131/88  |
|               | 65          |                                                            |         |                                                                                                                                                             |                                    |                                                                                                                    | 59                          | 59      |
|               | 60.1        |                                                            |         |                                                                                                                                                             |                                    |                                                                                                                    | October                     |         |
|               | 167.1       |                                                            |         |                                                                                                                                                             |                                    |                                                                                                                    |                             |         |
| 18            | Male        | 8 years                                                    | No      | Azilsartan (20 mg)<br>Lansoprazole (15 mg)<br>Atorvastatin calcium hydrate (10 mg)<br>Benidipine hydrochloride (4 mg)                                       | None                               | None                                                                                                               | 149/105                     | 139/101 |
|               | 55          |                                                            |         |                                                                                                                                                             |                                    |                                                                                                                    | 68                          | 78      |
|               | 93.4        |                                                            |         |                                                                                                                                                             |                                    |                                                                                                                    | November - December         |         |
|               | 168.1       |                                                            |         |                                                                                                                                                             |                                    |                                                                                                                    |                             |         |
| 19            | Male        | 2 years                                                    | No      | None                                                                                                                                                        | None                               | Walking 60 min (3 times)                                                                                           | 132/87                      | 129/89  |
|               | 41          |                                                            |         |                                                                                                                                                             |                                    |                                                                                                                    | 61                          | 58      |
|               | 92.3        |                                                            |         |                                                                                                                                                             |                                    |                                                                                                                    | January - February          |         |
|               | 183.2       |                                                            |         |                                                                                                                                                             |                                    |                                                                                                                    |                             |         |
| 20            | Female      | 1 year                                                     | No      | Amlodipine besilate (5 mg)<br>Atorvastatin calcium hydrate (10 mg)<br>Limaprost afadex (15 µg)<br>Loxoprofen sodium hydrate (120 mg)<br>Rebamipide (200 mg) | Swimming 40 min (5 times)          | None                                                                                                               | 135/84                      | 126/77  |
|               | 65          |                                                            |         |                                                                                                                                                             |                                    |                                                                                                                    | 70                          | 67      |
|               | 48.7        |                                                            |         |                                                                                                                                                             |                                    |                                                                                                                    | January - February          |         |
|               | 158.6       |                                                            |         |                                                                                                                                                             |                                    |                                                                                                                    |                             |         |
| 21            | Male        | 2 years                                                    | No      | None                                                                                                                                                        | None                               | None                                                                                                               | 154/102                     | 125/86  |
|               | 32          |                                                            |         |                                                                                                                                                             |                                    |                                                                                                                    | 68                          | 74      |
|               | 65.1        |                                                            |         |                                                                                                                                                             |                                    |                                                                                                                    | January - February          |         |
|               | 168.9       |                                                            |         |                                                                                                                                                             |                                    |                                                                                                                    |                             |         |
|               | Female      |                                                            |         |                                                                                                                                                             |                                    |                                                                                                                    |                             |         |
|               | 32          |                                                            |         |                                                                                                                                                             |                                    |                                                                                                                    |                             |         |
|               | 65.1        |                                                            |         |                                                                                                                                                             |                                    |                                                                                                                    |                             |         |
|               | 168.9       |                                                            |         |                                                                                                                                                             |                                    |                                                                                                                    |                             |         |
|               | 22.8        |                                                            |         |                                                                                                                                                             |                                    |                                                                                                                    |                             |         |

## Supplementary Table 2 | Information of participants in the human studies of protocol 1

and 2. SBP/DBP (mm Hg) and HR (bpm) just before and after VOCR are “value of the day”s in participants #1–#5 (protocol 1) and “value of the week”s in participants #6–#21 (protocol 2).

Participant 9 was excluded from our statistical analysis because of the high serum CRP value before VOCR (2.85 mg/dL), which made it difficult to rule out acute infection, a possible disqualifier, at the time of the initiation of VOCR, albeit the lack of specific complaint or local symptom related to acute physical problem(s). His serum CRP after the VOCR period was within the normal range (0.12 mg/dL).

| Participant # | Sex              | Period since diagnosis or self-recognition as hypertension    | Smoking                     | Current medication (dose per day)                                                                                                                                       | Habitual exercise (times per week)   | SBP/DBP (mm Hg) and HR (bpm) just before (left) and after (right) NOCR period (month of first - last bout of NOCR) |                  | SBP/DBP (mm Hg) and HR (bpm) just before (left) and after (right) VOCCR period (month of first - last bout of VOCCR) |                     |
|---------------|------------------|---------------------------------------------------------------|-----------------------------|-------------------------------------------------------------------------------------------------------------------------------------------------------------------------|--------------------------------------|--------------------------------------------------------------------------------------------------------------------|------------------|----------------------------------------------------------------------------------------------------------------------|---------------------|
|               | Age (years)      | Declared health problems and diseases other than hypertension | Alcohol (if yes, how often) |                                                                                                                                                                         |                                      | NOCR                                                                                                               | VOCCR            |                                                                                                                      |                     |
|               | Body weight (kg) |                                                               |                             |                                                                                                                                                                         |                                      |                                                                                                                    |                  |                                                                                                                      |                     |
|               | Height (cm)      |                                                               |                             |                                                                                                                                                                         |                                      |                                                                                                                    |                  |                                                                                                                      |                     |
|               | BMI              |                                                               |                             |                                                                                                                                                                         |                                      |                                                                                                                    |                  |                                                                                                                      |                     |
| 22<br>(15)    | Male             | Uncertain (>1 year)                                           | No                          | None                                                                                                                                                                    | None                                 | 132/84                                                                                                             | 136/85           | 134/84                                                                                                               | 124/73              |
|               | 44               |                                                               |                             |                                                                                                                                                                         |                                      | 69                                                                                                                 | 70               | 69                                                                                                                   |                     |
|               | 165              |                                                               |                             |                                                                                                                                                                         |                                      | None                                                                                                               | Occasionally     | September - October                                                                                                  | March - April       |
|               | 25.3             |                                                               |                             |                                                                                                                                                                         |                                      |                                                                                                                    |                  |                                                                                                                      |                     |
| 23            | Female           | 3 years                                                       | No                          | Mecobalamin (1.5 mg)                                                                                                                                                    | Walking<br>30 min<br>(2 or 3 times)  | 141/82                                                                                                             | 148/89           | 148/89                                                                                                               | 134/81              |
|               | 69               |                                                               |                             |                                                                                                                                                                         |                                      | 62                                                                                                                 | 65               | 63                                                                                                                   |                     |
|               | 152              |                                                               |                             |                                                                                                                                                                         |                                      | Lumbar spinal canal stenosis                                                                                       | No               | October - November                                                                                                   | November - December |
|               | 16.5             |                                                               |                             |                                                                                                                                                                         |                                      |                                                                                                                    |                  |                                                                                                                      |                     |
| 24            | Female           | None                                                          | Almost every day            | None                                                                                                                                                                    | Walking<br>30 min<br>(once or twice) | 144/94                                                                                                             | 150/96           | 155/102                                                                                                              | 143/92              |
|               | 45               |                                                               |                             |                                                                                                                                                                         |                                      | 86                                                                                                                 | 79               | 87                                                                                                                   | 79                  |
|               | 157              |                                                               |                             |                                                                                                                                                                         |                                      | None                                                                                                               | Almost every day | October - November                                                                                                   | March - April       |
|               | 19.9             |                                                               |                             |                                                                                                                                                                         |                                      |                                                                                                                    |                  |                                                                                                                      |                     |
| 25<br>(11)    | Female           | Uncertain (>1 year)                                           | No                          | Tamoxifen citrate (20 mg)                                                                                                                                               | None                                 | 150/96                                                                                                             | 139/91           | ND                                                                                                                   | ND                  |
|               | 61               |                                                               |                             |                                                                                                                                                                         |                                      | 83                                                                                                                 | 89               | ND                                                                                                                   |                     |
|               | 157              |                                                               |                             |                                                                                                                                                                         |                                      | Breast cancer (post-surgery)                                                                                       | Almost every day | October - November                                                                                                   | ND                  |
|               | 18.3             |                                                               |                             |                                                                                                                                                                         |                                      |                                                                                                                    |                  |                                                                                                                      |                     |
| 26<br>(17)    | Male             | 8 years                                                       | Yes                         | None                                                                                                                                                                    | None                                 | 132/87                                                                                                             | 129/85           | ND                                                                                                                   | ND                  |
|               | 66               |                                                               |                             |                                                                                                                                                                         |                                      | 58                                                                                                                 | 60               | ND                                                                                                                   |                     |
|               | 167.1            |                                                               |                             |                                                                                                                                                                         |                                      | None                                                                                                               | Almost every day | October - December                                                                                                   | ND                  |
|               | 21.5             |                                                               |                             |                                                                                                                                                                         |                                      |                                                                                                                    |                  |                                                                                                                      |                     |
| 27            | Male             | This study (<1 month)                                         | No                          | None                                                                                                                                                                    | None                                 | 142/92                                                                                                             | 142/94           | ND                                                                                                                   | ND                  |
|               | 37               |                                                               |                             |                                                                                                                                                                         |                                      | 63                                                                                                                 | 65               | ND                                                                                                                   |                     |
|               | 178              |                                                               |                             |                                                                                                                                                                         |                                      | None                                                                                                               | Occasionally     | October - November                                                                                                   | ND                  |
|               | 25.9             |                                                               |                             |                                                                                                                                                                         |                                      |                                                                                                                    |                  |                                                                                                                      |                     |
| 28            | Male             | This study (<1 month)                                         | No                          | None                                                                                                                                                                    | Resistance training (3 times)        | 131/76                                                                                                             | 131/81           | 131/81                                                                                                               | 123/78              |
|               | 23               |                                                               |                             |                                                                                                                                                                         |                                      | 59                                                                                                                 | 60               | 60                                                                                                                   | 62                  |
|               | 125              |                                                               |                             |                                                                                                                                                                         |                                      | None                                                                                                               | Occasionally     | November - December                                                                                                  | December - January  |
|               | 178              |                                                               |                             |                                                                                                                                                                         |                                      |                                                                                                                    |                  |                                                                                                                      |                     |
| 39.5          |                  |                                                               |                             |                                                                                                                                                                         |                                      |                                                                                                                    |                  |                                                                                                                      |                     |
| 29            | Female           | 14 years                                                      | No                          | Amlodin + Atorvastatin (5 mg + 5 mg)<br>Telmisartan (40 mg)<br>Vonoprazan (10 mg)                                                                                       | None                                 | 137/88                                                                                                             | 143/93           | 140/92                                                                                                               | 135/91              |
|               | 59               |                                                               |                             |                                                                                                                                                                         |                                      | 83                                                                                                                 | 72               | 75                                                                                                                   | 77                  |
|               | 160              |                                                               |                             |                                                                                                                                                                         |                                      | Hyperlipidemia                                                                                                     | No               | November - December                                                                                                  | January - February  |
|               | 30.3             |                                                               |                             |                                                                                                                                                                         |                                      |                                                                                                                    |                  |                                                                                                                      |                     |
| 30<br>(20)    | Female           | 2 years                                                       | No                          | Amlodipine besilate (5 mg)<br>Atorvastatin calcium hydrate (10 mg)<br>Limaprost alfadex (15 µg)<br>Loxoprofen sodium hydrate (120 mg)<br>Rebamipide (200 mg)            | Swimming<br>40 min<br>(5 times)      | 129/80                                                                                                             | 125/77           | ND                                                                                                                   | ND                  |
|               | 66               |                                                               |                             |                                                                                                                                                                         |                                      | 67                                                                                                                 | 70               | ND                                                                                                                   |                     |
|               | 158.6            |                                                               |                             |                                                                                                                                                                         |                                      | Hyperlipidemia                                                                                                     | Almost every day | November - December                                                                                                  | ND                  |
|               | 19.4             |                                                               |                             |                                                                                                                                                                         |                                      | Lumbar spinal canal stenosis (post-surgery)                                                                        |                  |                                                                                                                      |                     |
| 31<br>(7)     | Male             | Uncertain (>1 year)                                           | No                          | Metformin hydrochloride (1000 mg)<br>Rosuvastatin calcium (5 mg)<br>Sitagliptin phosphate hydrate (50 mg)                                                               | Walking<br>120 min<br>(once)         | 141/86                                                                                                             | 148/91           | 146/86                                                                                                               | 141/89              |
|               | 62               |                                                               |                             |                                                                                                                                                                         |                                      | 87                                                                                                                 | 89               | 90                                                                                                                   | 90                  |
|               | 168              |                                                               |                             |                                                                                                                                                                         |                                      | Diabetes mellitus                                                                                                  | No               | November - December                                                                                                  | January - February  |
|               | 23.7             |                                                               |                             |                                                                                                                                                                         |                                      | Hyperlipidemia                                                                                                     |                  |                                                                                                                      |                     |
| 32            | Female           | Uncertain (>1 year)                                           | No                          | Irbesartan (50 mg)<br>Warfarin potassium (1 mg)<br>Bisoprolol fumarate (5 mg)<br>Lansoprazole (15 mg)<br>Cilindipine (5 mg)<br>Topiroxostat (20 mg)<br>Ramelteon (8 mg) | None                                 | 170/110                                                                                                            | 164/107          | 164/107                                                                                                              | 164/105             |
|               | 75               |                                                               |                             |                                                                                                                                                                         |                                      | 66                                                                                                                 | 68               | 68                                                                                                                   | 66                  |
|               | 157              |                                                               |                             |                                                                                                                                                                         |                                      | Atrial fibrillation                                                                                                | Almost every day | February - March                                                                                                     | March - April       |
|               | 25.2             |                                                               |                             |                                                                                                                                                                         |                                      | Hyperuricemia                                                                                                      |                  |                                                                                                                      |                     |
| 33            | Male             | 7 year                                                        | No                          | None                                                                                                                                                                    | Squash<br>120 min<br>(4 times)       | 145/92                                                                                                             | 150/96           | 147/93                                                                                                               | 142/94              |
|               | 71               |                                                               |                             |                                                                                                                                                                         |                                      | 64                                                                                                                 | 62               | 64                                                                                                                   | 58                  |
|               | 165              |                                                               |                             |                                                                                                                                                                         |                                      | Prostate cancer (post-radiation therapy)                                                                           | Almost every day | February - March                                                                                                     | March - April       |
|               | 22.8             |                                                               |                             |                                                                                                                                                                         |                                      |                                                                                                                    |                  |                                                                                                                      |                     |
| 34            | Female           | This study (<1 month)                                         | No                          | None                                                                                                                                                                    | None                                 | 134/94                                                                                                             | 130/89           | 130/89                                                                                                               | 128/90              |
|               | 46               |                                                               |                             |                                                                                                                                                                         |                                      | 75                                                                                                                 | 76               | 76                                                                                                                   | 79                  |
|               | 167              |                                                               |                             |                                                                                                                                                                         |                                      | None                                                                                                               | No               | February - March                                                                                                     | March - April       |
|               | 23.3             |                                                               |                             |                                                                                                                                                                         |                                      |                                                                                                                    |                  |                                                                                                                      |                     |
| 35            | Female           | 19 years                                                      | No                          | None                                                                                                                                                                    | None                                 | 149/83                                                                                                             | 148/80           | 149/81                                                                                                               | 149/79              |
|               | 69               |                                                               |                             |                                                                                                                                                                         |                                      | 61                                                                                                                 | 60               | 64                                                                                                                   | 60                  |
|               | 148              |                                                               |                             |                                                                                                                                                                         |                                      | Hyperlipidemia                                                                                                     | Almost every day | February - March                                                                                                     | March - April       |
|               | 29.7             |                                                               |                             |                                                                                                                                                                         |                                      |                                                                                                                    |                  |                                                                                                                      |                     |



| Participant # | Sex         | Period since diagnosis or self-recognition as hypertension    | Smoking                     | Current medication (dose per day)                                                                                                                                                                   | Habitual exercise (times per week) | SBP/DBP (mm Hg) and HR (bpm) just before (left) and after (right) NOCR period (month of first - last bout of NOCR) |        | SBP/DBP (mm Hg) and HR (bpm) just before (left) and after (right) VOCR period (month of first - last bout of VOCR) |        |
|---------------|-------------|---------------------------------------------------------------|-----------------------------|-----------------------------------------------------------------------------------------------------------------------------------------------------------------------------------------------------|------------------------------------|--------------------------------------------------------------------------------------------------------------------|--------|--------------------------------------------------------------------------------------------------------------------|--------|
|               | Age (years) | Declared health problems and diseases other than hypertension | Alcohol (if yes, how often) |                                                                                                                                                                                                     |                                    | 1                                                                                                                  | 2      | 3                                                                                                                  | 4      |
| 36            | Female      | 3 years                                                       | No                          | None                                                                                                                                                                                                | Walking 60 min (5 times)           | 141/87                                                                                                             | 132/82 | 132/82                                                                                                             | 127/81 |
|               | 52          |                                                               |                             |                                                                                                                                                                                                     |                                    | 51                                                                                                                 | 51     | 51                                                                                                                 |        |
| 37            | Female      | 1 year                                                        | No                          | None                                                                                                                                                                                                | None                               | 143/87                                                                                                             | 144/90 | 151/91                                                                                                             | 135/87 |
|               | 69          |                                                               |                             |                                                                                                                                                                                                     |                                    | 64                                                                                                                 | 65     | 62                                                                                                                 |        |
| 38            | Male        | 2 years                                                       | Yes                         | None                                                                                                                                                                                                | None                               | 156/96                                                                                                             | 152/93 | 152/93                                                                                                             | 144/87 |
|               | 67          |                                                               |                             |                                                                                                                                                                                                     |                                    | 69                                                                                                                 | 69     | 66                                                                                                                 |        |
| 39            | Female      | 29 years                                                      | No                          | Candesartan cilexetil • Amlodipine (8 mg • 5mg)<br>Rivaroxaban (10 mg)<br>Rosuvastatin (5 mg)<br>Carvedilol (5 mg)<br>Metformin hydrochloride (500 mg)<br>Esomeprazole (20 mg)<br>Sennoside (60 mg) | None                               | 136/82                                                                                                             | 139/85 | 137/85                                                                                                             | 128/77 |
|               | 83          |                                                               |                             |                                                                                                                                                                                                     |                                    | 82                                                                                                                 | 80     | 79                                                                                                                 |        |
| 40            | Male        | 13 years                                                      | No                          | Valsartan • Amlodipine (80 mg • 5 mg)<br>Atorvastatin (10 mg)<br>Benzbromarone (25 mg)<br>Canagliflozin (100 mg)<br>Metformin hydrochloride (1000 mg)<br>Bisoprolol fumarate (5 mg)                 | None                               | 147/80                                                                                                             | 152/80 | ND                                                                                                                 | ND     |
|               | 73          |                                                               |                             |                                                                                                                                                                                                     |                                    | 75                                                                                                                 | ND     | ND                                                                                                                 |        |

### Supplementary Table 3 | Information of participants in the study of protocol 3. SBP/DBP

(mm Hg) and HR (bpm) just before and after NOCR or VOCR are “value of the week”s. Five of 19 participants in protocol 3 were participants in protocol 2. The parenthesized participant numbers indicate their participant numbers in protocol 2 (see Supplementary Table 2). They participated in protocol 3 upon their eligibility check at least nine months after the last bout of VOCR in protocol 2.

**Supplementary Video 1 | Rat treadmill running and PHM.** Treadmill running at a velocity of 20 m/min (top), and PHM that generates mechanical accelerations with a peak magnitude of 1.0  $\times g$  at the head (bottom) are shown.

**Supplementary Video 2 | Vertically oscillating chair riding (VOCR).** This video was taken solely to present the system with consent from the person who volunteered to join the filming as an occupant of the chair. It is not a record of the human study described in this paper.

## References

1. Carman, P.C. Fluid flow through granular beds. *Chemical Engineering Research and Design* **75**, S32-S48 (1997).
2. Xu, P. & Yu, B. Developing a new form of permeability and Kozeny–Carman constant for homogeneous porous media by means of fractal geometry. *Advances in Water Resources* **31**, 74-81 (2008).
3. Pedersen, J.A., Boschetti, F. & Swartz, M.A. Effects of extracellular fiber architecture on cell membrane shear stress in a 3D fibrous matrix. *J Biomech* **40**, 1484-1492 (2007).
4. Geer, C.P. & Grossman, S.A. Interstitial fluid flow along white matter tracts: a potentially important mechanism for the dissemination of primary brain tumors. *J Neurooncol* **32**, 193-201 (1997).
5. Kingsmore, K.M., *et al.* MRI analysis to map interstitial flow in the brain tumor microenvironment. *APL Bioeng* **2**(2018).
6. Cserr, H.F. & Patlak, C.S. Secretion and bulk flow of interstitial fluid. in *Physiology and Pharmacology of the Blood-Brain Barrier* (ed. Bradbury, M.W.B.) 245-261 (Springer Berlin Heidelberg, Berlin, Heidelberg, 1992).
7. Yetkin, F., *et al.* Cerebrospinal fluid viscosity: a novel diagnostic measure for acute meningitis. *South Med J* **103**, 892-895 (2010).
8. Bloomfield, I.G., Johnston, I.H. & Bilston, L.E. Effects of proteins, blood cells and glucose on the viscosity of cerebrospinal fluid. *Pediatr Neurosurg* **28**, 246-251 (1998).
9. Tarbell, J.M. & Shi, Z.-D. Effect of the glycocalyx layer on transmission of interstitial flow shear stress to embedded cells. *Biomechanics and modeling in mechanobiology* **12**, 111-121 (2013).

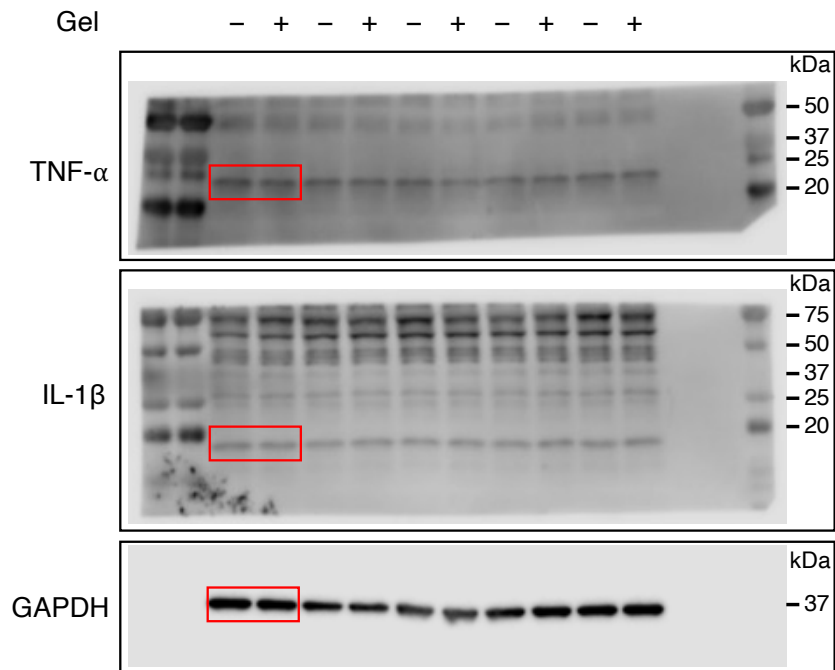

**Supplementary Data 1 | Uncropped blots for Supplementary Figure 3h.**

## Information of Statistical Analyses

| Figure    | <i>n</i>                                                                                                                                               | Statistical test                                                                     | <i>P</i> -value                 |                   |
|-----------|--------------------------------------------------------------------------------------------------------------------------------------------------------|--------------------------------------------------------------------------------------|---------------------------------|-------------------|
| Figure 1b | <i>n</i> = 7 rats for each group of WKY; <i>n</i> = 8 rats for each group of SHRSP                                                                     | two-way repeated measures ANOVA with Bonferroni's post hoc multiple comparisons test | SHRSP PHM (-) vs. (+) for Day15 | <i>P</i> = 0.1344 |
|           |                                                                                                                                                        |                                                                                      | SHRSP PHM (-) vs. (+) for Day22 | <i>P</i> = 0.0110 |
|           |                                                                                                                                                        |                                                                                      | SHRSP PHM (-) vs. (+) for Day29 | <i>P</i> = 0.0463 |
|           |                                                                                                                                                        |                                                                                      | WKY PHM (-) vs. (+) for Day15   | <i>P</i> > 0.9999 |
|           |                                                                                                                                                        |                                                                                      | WKY PHM (-) vs. (+) for Day22   | <i>P</i> > 0.9999 |
|           |                                                                                                                                                        |                                                                                      | WKY PHM (-) vs. (+) for Day29   | <i>P</i> > 0.9999 |
| Figure 1c | <i>n</i> = 7 rats for each group of WKY; <i>n</i> = 8 rats for each group of SHRSP                                                                     | one-way ANOVA with Tukey's post hoc multiple comparisons test                        | column 1 vs. 2                  | <i>P</i> = 0.9739 |
|           |                                                                                                                                                        |                                                                                      | column 3 vs. 4                  | <i>P</i> = 0.0046 |
| Figure 1d | <i>n</i> = 7 rats for each group of WKY; <i>n</i> = 8 rats for each group of SHRSP                                                                     | one-way ANOVA with Tukey's post hoc multiple comparisons test                        | column 1 vs. 2                  | <i>P</i> = 0.9650 |
|           |                                                                                                                                                        |                                                                                      | column 3 vs. 4                  | <i>P</i> = 0.2362 |
| Figure 1e | <i>n</i> = 10 rats for WKY, PHM (-); <i>n</i> = 13 rats for WKY, PHM (+); <i>n</i> = 10 rats for SHRSP, PHM (-); <i>n</i> = 14 rats for SHRSP, PHM (+) | one-way ANOVA with Tukey's post hoc multiple comparisons test                        | column 1 vs. 2                  | <i>P</i> = 0.9866 |
|           |                                                                                                                                                        |                                                                                      | column 3 vs. 4                  | <i>P</i> = 0.0152 |
| Figure 1f | <i>n</i> = 8 rats for each group of WKY; <i>n</i> = 16 rats for SHRSP, PHM (-); <i>n</i> = 13 rats for SHRSP, PHM (+)                                  | one-way ANOVA with Tukey's post hoc multiple comparisons test                        | column 1 vs. 2                  | <i>P</i> = 0.9854 |
|           |                                                                                                                                                        |                                                                                      | column 3 vs. 4                  | <i>P</i> = 0.0085 |
| Figure 1i | <i>n</i> = 3 rats for each group                                                                                                                       | one-way ANOVA with Tukey's post hoc multiple comparisons test                        | column 1 vs. 2                  | <i>P</i> = 0.9602 |
|           |                                                                                                                                                        |                                                                                      | column 1 vs. 3                  | <i>P</i> = 0.9215 |
|           |                                                                                                                                                        |                                                                                      | column 3 vs. 4                  | <i>P</i> = 0.9313 |
| Figure 1j | <i>n</i> = 3 rats for each group                                                                                                                       | one-way ANOVA with Tukey's post hoc multiple comparisons test                        | column 1 vs. 2                  | <i>P</i> = 0.9455 |
|           |                                                                                                                                                        |                                                                                      | column 1 vs. 3                  | <i>P</i> = 0.0004 |
|           |                                                                                                                                                        |                                                                                      | column 3 vs. 4                  | <i>P</i> = 0.0002 |
| Figure 2c | <i>n</i> = 5 rats for each group of WKY; <i>n</i> = 7 rats for SHRSP, PHM (-); <i>n</i> = 8 rats for                                                   | one-way ANOVA with Tukey's post hoc multiple comparisons test                        | column 1 vs. 2                  | <i>P</i> = 0.9876 |
|           |                                                                                                                                                        |                                                                                      | column 3 vs. 4                  | <i>P</i> = 0.0003 |

|           |                                                                                                    |                                                                                      |                              |              |
|-----------|----------------------------------------------------------------------------------------------------|--------------------------------------------------------------------------------------|------------------------------|--------------|
|           | SHRSP, PHM (+)                                                                                     |                                                                                      |                              |              |
| Figure 2e | $n = 3$ rats for WKY, PHM (-); $n = 5$ rats for WKY, PHM (+); $n = 4$ rats for each group of SHRSP | one-way ANOVA with Tukey's post hoc multiple comparisons test                        | column 1 vs. 2               | $P = 0.9953$ |
|           |                                                                                                    |                                                                                      | column 3 vs. 4               | $P = 0.0099$ |
| Figure 3d | $n = 7$ rats for GFAP-AGTRAP; $n = 7$ rats for NSE-control; $n = 6$ rats for NSE-AGTRAP            | two-way repeated measures ANOVA with Bonferroni's post hoc multiple comparisons test | GFAP-control vs. GFAP-AGTRAP | $P = 0.0222$ |
|           |                                                                                                    |                                                                                      | NSE-control vs. NSE-AGTRAP   | $P > 0.9999$ |
| Figure 3e | $n = 7$ rats for GFAP-AGTRAP; $n = 7$ rats for NSE-control; $n = 6$ rats for NSE-AGTRAP            | one-way ANOVA with Tukey's post hoc multiple comparisons test                        | column 1 vs. 2               | $P = 0.0229$ |
|           |                                                                                                    |                                                                                      | column 3 vs. 4               | $P = 0.6864$ |
| Figure 3f | $n = 4$ rats for each group                                                                        | one-way ANOVA with Tukey's post hoc multiple comparisons test                        | column 1 vs. 2               | $P = 0.0497$ |
|           |                                                                                                    |                                                                                      | column 3 vs. 4               | $P = 0.7455$ |
| Figure 4d | $n = 4$ rats for each group                                                                        | unpaired two-tailed Student's t-test                                                 |                              | $P = 0.0089$ |
| Figure 4h | $n = 3$ rats for each group                                                                        | unpaired two-tailed Student's t-test                                                 | left chart                   | $P = 0.6666$ |
|           |                                                                                                    |                                                                                      | middle chart                 | $P = 0.0218$ |
|           |                                                                                                    |                                                                                      | right chart                  | $P = 0.0244$ |
| Figure 5a | $n = 4$                                                                                            | unpaired two-tailed Student's t-test                                                 | for 0.05 Pa                  | $P = 0.6453$ |
|           |                                                                                                    |                                                                                      | for 0.05 Pa                  | $P = 0.7517$ |
|           |                                                                                                    |                                                                                      | for 0.3 Pa                   | $P = 0.0226$ |
|           |                                                                                                    |                                                                                      | for 0.5 Pa                   | $P = 0.0064$ |
|           |                                                                                                    |                                                                                      | for 0.7 Pa                   | $P < 0.0001$ |
| Figure 5b | $n = 4$                                                                                            | unpaired two-tailed Student's t-test                                                 | for 1 mm Hg                  | $P = 0.5592$ |
|           |                                                                                                    |                                                                                      | for 10 mm Hg                 | $P = 0.7113$ |
|           |                                                                                                    |                                                                                      | for 20 mm Hg                 | $P = 0.0088$ |
|           |                                                                                                    |                                                                                      | for 40 mm Hg                 | $P < 0.0001$ |
| Figure 5d | $n = 4$ for 6 h FSS (-); $n = 3$ for the other groups                                              | unpaired two-tailed Student's t-test                                                 | for 6 h                      | $P = 0.0049$ |
|           |                                                                                                    |                                                                                      | for 24 h                     | $P = 0.0006$ |
| Figure 5f | $n = 3$ for each group                                                                             | unpaired two-tailed Student's t-test                                                 | for 6 h                      | $P = 0.0002$ |
|           |                                                                                                    |                                                                                      | for 24 h.                    | $P = 0.0104$ |
| Figure 6b | $n = 7$ rats for Gel (-), PHM (+) and Gel (+),                                                     | two-way repeated measures ANOVA with Tukey's post hoc multiple comparisons test      | blue vs. orange for Day 15   | $P = 0.4314$ |
|           |                                                                                                    |                                                                                      | blue vs. orange for Day 22   | $P = 0.4685$ |

|           |                                                                                                                                                                                                                            |                                                                  |                             |              |
|-----------|----------------------------------------------------------------------------------------------------------------------------------------------------------------------------------------------------------------------------|------------------------------------------------------------------|-----------------------------|--------------|
|           | PHM (+);<br>$n = 6$ rats<br>for Gel<br>(+), PHM<br>(-)                                                                                                                                                                     |                                                                  | blue vs. orange for Day 29  | $P = 0.0389$ |
|           |                                                                                                                                                                                                                            |                                                                  | blue vs. black for Day 15   | $P = 0.5372$ |
|           |                                                                                                                                                                                                                            |                                                                  | blue vs. black for Day 22   | $P = 0.2000$ |
|           |                                                                                                                                                                                                                            |                                                                  | blue vs. black for Day 29   | $P = 0.0406$ |
|           |                                                                                                                                                                                                                            |                                                                  | black vs. orange for Day 15 | $P = 0.9911$ |
|           |                                                                                                                                                                                                                            |                                                                  | black vs. orange for Day 22 | $P = 0.8222$ |
|           |                                                                                                                                                                                                                            |                                                                  | black vs. orange for Day 29 | $P = 0.9965$ |
| Figure 6c | $n = 7$ rats<br>for Gel<br>(-), PHM<br>(+) and<br>Gel (+),<br>PHM (+);<br>$n = 6$ rats<br>for Gel<br>(+), PHM<br>(-)                                                                                                       | one-way ANOVA with Tukey's post hoc<br>multiple comparisons test | column 1 vs. 2              | $P = 0.0387$ |
|           |                                                                                                                                                                                                                            |                                                                  | column 1 vs. 3              | $P = 0.0372$ |
|           |                                                                                                                                                                                                                            |                                                                  | column 2 vs. 3              | $P = 0.9959$ |
| Figure 6d | $n = 5$ rats<br>for each<br>group                                                                                                                                                                                          | one-way ANOVA with Tukey's post hoc<br>multiple comparisons test | column 1 vs. 2              | $P = 0.0247$ |
|           |                                                                                                                                                                                                                            |                                                                  | column 1 vs. 3              | $P = 0.0307$ |
|           |                                                                                                                                                                                                                            |                                                                  | column 2 vs. 3              | $P = 0.9920$ |
| Figure 6f | $n = 4$ rats<br>for each<br>group                                                                                                                                                                                          | one-way ANOVA with Tukey's post hoc<br>multiple comparisons test | column 1 vs. 2              | $P < 0.0001$ |
|           |                                                                                                                                                                                                                            |                                                                  | column 1 vs. 3              | $P < 0.0001$ |
|           |                                                                                                                                                                                                                            |                                                                  | column 2 vs. 3              | $P = 0.1597$ |
| Figure 6g | $n = 4$ rats<br>for each<br>group                                                                                                                                                                                          | one-way ANOVA with Tukey's post hoc<br>multiple comparisons test | column 1 vs. 2              | $P = 0.6029$ |
|           |                                                                                                                                                                                                                            |                                                                  | column 1 vs. 3              | $P = 0.9963$ |
|           |                                                                                                                                                                                                                            |                                                                  | column 2 vs. 3              | $P = 0.5552$ |
| Figure 7a | $n = 15$                                                                                                                                                                                                                   | paired two-tailed Student's t-test                               | SBP                         | $P = 0.0005$ |
|           |                                                                                                                                                                                                                            |                                                                  | DBP                         | $P = 0.0011$ |
|           |                                                                                                                                                                                                                            |                                                                  | MAP                         | $P = 0.0008$ |
|           |                                                                                                                                                                                                                            |                                                                  | HR                          | $P = 0.7845$ |
| Figure 7b | $n = 15$ for<br>Pre and<br>Weeks 1<br>to 5; $n =$<br>13 for<br>Week 6; $n$<br>$= 12$ for<br>Week 7; $n$<br>$= 11$ for<br>Weeks 8<br>and 9; $n =$<br>9 for<br>Week 10;<br>$n = 7$ for<br>Week 11;<br>$n = 3$ for<br>Week 12 | paired two-tailed Student's t-test                               | SBP for Pre vs. Week 1      | $P = 0.0293$ |
|           |                                                                                                                                                                                                                            |                                                                  | SBP for Pre vs. Week 2      | $P = 0.0028$ |
|           |                                                                                                                                                                                                                            |                                                                  | SBP for Pre vs. Week 3      | $P = 0.0013$ |
|           |                                                                                                                                                                                                                            |                                                                  | SBP for Pre vs. Week 4      | $P = 0.0035$ |
|           |                                                                                                                                                                                                                            |                                                                  | SBP for Pre vs. Week 5      | $P = 0.0002$ |
|           |                                                                                                                                                                                                                            |                                                                  | SBP for Pre vs. Week 6      | $P = 0.0078$ |
|           |                                                                                                                                                                                                                            |                                                                  | SBP for Pre vs. Week 7      | $P = 0.0035$ |
|           |                                                                                                                                                                                                                            |                                                                  | SBP for Pre vs. Week 8      | $P = 0.0075$ |
|           |                                                                                                                                                                                                                            |                                                                  | SBP for Pre vs. Week 9      | $P = 0.2132$ |

|                         |              |
|-------------------------|--------------|
| SBP for Pre vs. Week 10 | $P = 0.1314$ |
| SBP for Pre vs. Week 11 | $P = 0.0973$ |
| SBP for Pre vs. Week 12 | $P = 0.3993$ |
| DBP for Pre vs. Week 1  | $P = 0.3022$ |
| DBP for Pre vs. Week 2  | $P = 0.0436$ |
| DBP for Pre vs. Week 3  | $P = 0.0010$ |
| DBP for Pre vs. Week 4  | $P = 0.0100$ |
| DBP for Pre vs. Week 5  | $P = 0.0006$ |
| DBP for Pre vs. Week 6  | $P = 0.0599$ |
| DBP for Pre vs. Week 7  | $P = 0.0488$ |
| DBP for Pre vs. Week 8  | $P = 0.0096$ |
| DBP for Pre vs. Week 9  | $P = 0.9346$ |
| DBP for Pre vs. Week 10 | $P = 0.7850$ |
| DBP for Pre vs. Week 11 | $P = 0.0769$ |
| DBP for Pre vs. Week 12 | $P = 0.3137$ |
| MAP for Pre vs. Week 1  | $P = 0.1075$ |
| MAP for Pre vs. Week 2  | $P = 0.0132$ |
| MAP for Pre vs. Week 3  | $P = 0.0008$ |
| MAP for Pre vs. Week 4  | $P = 0.0063$ |
| MAP for Pre vs. Week 5  | $P = 0.0003$ |
| MAP for Pre vs. Week 6  | $P = 0.0251$ |
| MAP for Pre vs. Week 7  | $P = 0.0136$ |
| MAP for Pre vs. Week 8  | $P = 0.0071$ |
| MAP for Pre vs. Week 9  | $P = 0.6795$ |
| MAP for Pre vs. Week 10 | $P = 0.4295$ |
| MAP for Pre vs. Week 11 | $P = 0.0704$ |
| MAP for Pre vs. Week 12 | $P = 0.3662$ |
| HR for Pre vs. Week 1   | $P = 0.6287$ |
| HR for Pre vs. Week 2   | $P = 0.7840$ |
| HR for Pre vs. Week 3   | $P = 0.1573$ |
| HR for Pre vs. Week 4   | $P = 0.5380$ |
| HR for Pre vs. Week 5   | $P = 0.7331$ |
| HR for Pre vs. Week 6   | $P = 0.6995$ |



|           |                                      |                                    |                        |              |
|-----------|--------------------------------------|------------------------------------|------------------------|--------------|
|           |                                      |                                    | HR for Pre vs. Week 7  | $P = 0.9110$ |
|           |                                      |                                    | HR for Pre vs. Week 8  | $P = 0.9875$ |
|           |                                      |                                    | HR for Pre vs. Week 9  | $P = 0.5866$ |
|           |                                      |                                    | HR for Pre vs. Week 10 | $P = 0.9566$ |
|           |                                      |                                    | HR for Pre vs. Week 11 | $P = 0.6487$ |
|           |                                      |                                    | HR for Pre vs. Week 12 | $P = 0.9905$ |
| Figure 8a | $n = 19$ for NOCR; $n = 14$ for VOCR | paired two-tailed Student's t-test | NOCR, SBP              | $P = 0.9148$ |
|           |                                      |                                    | NOCR, DBP              | $P = 0.6597$ |
|           |                                      |                                    | NOCR, MAP              | $P = 0.7502$ |
|           |                                      |                                    | NOCR, HR               | $P = 0.9002$ |
|           |                                      |                                    | VOCR, SBP              | $P = 0.0001$ |
|           |                                      |                                    | VOCR, DBP              | $P = 0.0051$ |
|           |                                      |                                    | VOCR, MAP              | $P = 0.0006$ |
|           |                                      |                                    | VOCR, HR               | $P = 0.0867$ |
| Figure 8b | $n = 10$ for NOCR; $n = 12$ for VOCR | Wilcoxon signed-rank test          | NOCR                   | $P = 0.492$  |
|           |                                      |                                    | VOCR                   | $P = 0.016$  |
| Figure 8c | $n = 12$ for NOCR; $n = 12$ for VOCR | Wilcoxon signed-rank test          | NOCR                   | $P = 0.969$  |
|           |                                      |                                    | VOCR                   | $P = 0.063$  |

| Figure                  | $n$                                                                                                           | Statistical test                                                                     | P-value                       |              |
|-------------------------|---------------------------------------------------------------------------------------------------------------|--------------------------------------------------------------------------------------|-------------------------------|--------------|
| Extended Data Figure 1a | $n = 6$ rats for no daily anesthesia; $n = 8$ rats for PHM (-)                                                | two-way repeated measures ANOVA with Bonferroni's post hoc multiple comparisons test | for Day 15                    | $P > 0.9999$ |
|                         |                                                                                                               |                                                                                      | for Day 22                    | $P > 0.9999$ |
|                         |                                                                                                               |                                                                                      | for Day 29                    | $P > 0.9999$ |
| Extended Data Figure 1c | $n = 15$ rats for PHM (-); $n = 15$ rats for PHM (+)                                                          | long-rank test                                                                       |                               | $P = 0.1179$ |
| Extended Data Figure 1d | $n = 9$ rats for PHM (-); $n = 8$ rats for PHM (+)                                                            | long-rank test                                                                       |                               | $P = 0.0093$ |
| Extended Data Figure 2b | $n = 8$ rats for PHM (-) and PHM (dorsal-ventral); $n = 5$ rats for PHM (rostral-caudal) and PHM (left-right) | two-way repeated measures ANOVA with Dunnett's post hoc multiple comparisons test    | orange vs. blue for Day 15    | $P = 0.0376$ |
|                         |                                                                                                               |                                                                                      | orange vs. blue for Day 22    | $P = 0.0018$ |
|                         |                                                                                                               |                                                                                      | orange vs. blue for Day 29    | $P = 0.0105$ |
|                         |                                                                                                               |                                                                                      | orange vs. magenta for Day 15 | $P = 0.4131$ |
|                         |                                                                                                               |                                                                                      | orange vs. magenta for Day 22 | $P = 0.2448$ |
|                         |                                                                                                               |                                                                                      | orange vs. magenta for Day 29 | $P = 0.0148$ |
|                         |                                                                                                               |                                                                                      | orange vs. green for Day 15   | $P = 0.4869$ |

|                         |                                                                                                               |                                                                                   |                               |              |
|-------------------------|---------------------------------------------------------------------------------------------------------------|-----------------------------------------------------------------------------------|-------------------------------|--------------|
|                         |                                                                                                               |                                                                                   | orange vs. green for Day 22   | $P = 0.6439$ |
|                         |                                                                                                               |                                                                                   | orange vs. green for Day 29   | $P = 0.9273$ |
| Extended Data Figure 2c | $n = 8$ rats for PHM (-) and PHM (dorsal-ventral); $n = 5$ rats for PHM (rostral-caudal) and PHM (left-right) | one-way ANOVA with Tukey's post hoc multiple comparisons test                     | column 1 vs. 2                | $P = 0.0363$ |
|                         |                                                                                                               |                                                                                   | for column 1 vs. 3            | $P = 0.0465$ |
|                         |                                                                                                               |                                                                                   | for column 1 vs. 4            | $P = 0.9576$ |
|                         |                                                                                                               |                                                                                   | for column 2 vs. 3            | $P = 0.9948$ |
| Extended Data Figure 3b | $n = 8$ rats for PHM (-) and PHM (2 Hz); $n = 5$ rats for PHM (0.5 Hz) and PHM (0.2 Hz)                       | two-way repeated measures ANOVA with Dunnett's post hoc multiple comparisons test | orange vs. blue for Day 15    | $P = 0.1871$ |
|                         |                                                                                                               |                                                                                   | orange vs. blue for Day 22    | $P = 0.0519$ |
|                         |                                                                                                               |                                                                                   | orange vs. blue for Day 29    | $P = 0.0282$ |
|                         |                                                                                                               |                                                                                   | orange vs. magenta for Day 15 | $P = 0.7252$ |
|                         |                                                                                                               |                                                                                   | orange vs. magenta for Day 22 | $P = 0.2053$ |
|                         |                                                                                                               |                                                                                   | orange vs. magenta for Day 29 | $P = 0.0208$ |
|                         |                                                                                                               |                                                                                   | orange vs. green for Day 15   | $P = 0.9212$ |
|                         |                                                                                                               |                                                                                   | orange vs. green for Day 22   | $P = 0.9356$ |
|                         |                                                                                                               |                                                                                   | orange vs. green for Day 29   | $P = 0.8950$ |
| Extended Data Figure 3c | $n = 8$ rats for PHM (-) and PHM (2 Hz); $n = 5$ rats for PHM (0.5 Hz) and PHM (0.2 Hz)                       | one-way ANOVA with Tukey's post hoc multiple comparisons test                     | for column 1 vs. 2            | $P = 0.0435$ |
|                         |                                                                                                               |                                                                                   | for column 1 vs. 3            | $P = 0.0174$ |
|                         |                                                                                                               |                                                                                   | for column 1 vs. 4            | $P = 0.9068$ |
|                         |                                                                                                               |                                                                                   | for column 2 vs. 3            | $P = 0.8682$ |
| Extended Data Figure 3d | $n = 8$ rats for PHM (-), PHM (1 × g), and PHM (0.2 × g); $n = 7$ rats for PHM (0.5 × g)                      | two-way repeated measures ANOVA with Dunnett's post hoc multiple comparisons test | orange vs. blue for Day 15    | $P = 0.1812$ |
|                         |                                                                                                               |                                                                                   | orange vs. blue for Day 22    | $P = 0.0504$ |
|                         |                                                                                                               |                                                                                   | orange vs. blue for Day 29    | $P = 0.0274$ |
|                         |                                                                                                               |                                                                                   | orange vs. magenta for Day 15 | $P = 0.4146$ |
|                         |                                                                                                               |                                                                                   | orange vs. magenta for Day 22 | $P = 0.1740$ |
|                         |                                                                                                               |                                                                                   | orange vs. magenta for Day 29 | $P = 0.0036$ |
|                         |                                                                                                               |                                                                                   | orange vs. green for Day 15   | $P = 0.9996$ |
|                         |                                                                                                               |                                                                                   | orange vs. green for Day 22   | $P = 0.9267$ |
|                         |                                                                                                               |                                                                                   | orange vs. green for Day 29   | $P = 0.1618$ |
| Extended Data Figure 3e | $n = 8$ rats for PHM (-), PHM (1 × g), and PHM (0.2 × g); $n = 7$ rats for PHM (0.5 × g)                      | one-way ANOVA with Tukey's post hoc multiple comparisons test                     | column 1 vs. 2                | $P = 0.0227$ |
|                         |                                                                                                               |                                                                                   | column 1 vs. 3                | $P = 0.0014$ |
|                         |                                                                                                               |                                                                                   | column 1 vs. 4                | $P = 0.1664$ |
|                         |                                                                                                               |                                                                                   | column 2 vs. 3                | $P = 0.6283$ |
| Extended Data Figure 4b | $n = 3$ rats for treadmill (-); $n = 4$ rats for treadmill (+)                                                | unpaired two-tailed Student's t-test                                              |                               | $P = 0.7056$ |

|                          |                                                                                                                                                                                         |                                                                                      |                  |              |
|--------------------------|-----------------------------------------------------------------------------------------------------------------------------------------------------------------------------------------|--------------------------------------------------------------------------------------|------------------|--------------|
| Extended Data Figure 4c  | $n = 3$ rats for treadmill (-); $n = 4$ rats for treadmill (+)                                                                                                                          | unpaired two-tailed Student's $t$ -test                                              |                  | $P = 0.0048$ |
| Extended Data Figure 5c  | $n = 3$ rats for each group                                                                                                                                                             | unpaired two-tailed Student's $t$ -test                                              | column 1 vs. 2   | $P < 0.0001$ |
|                          |                                                                                                                                                                                         |                                                                                      | column 3 vs. 4   | $P < 0.0001$ |
| Extended Data Figure 5e  | $n = 3$ rats for each group                                                                                                                                                             | unpaired two-tailed Student's $t$ -test                                              | column 1 vs. 2   | $P < 0.0001$ |
|                          |                                                                                                                                                                                         |                                                                                      | column 3 vs. 4   | $P < 0.0001$ |
| Extended Data Figure 5f  | $n = 6$ rats for no AAV injection; $n = 6$ rats for GFAP-control; $n = 7$ rats for NSE-control                                                                                          | two-way repeated measures ANOVA with Tukey's post hoc multiple comparisons test      | blue vs. orange  | $P = 0.9918$ |
|                          |                                                                                                                                                                                         |                                                                                      | blue vs. black   | $P = 0.6465$ |
|                          |                                                                                                                                                                                         |                                                                                      | orange vs. black | $P = 0.5966$ |
| Extended Data Figure 5g  | GFAP-control: $n = 6$ rats for Day 1, Day 8, and Day 15; $n = 3$ rats for Day 22 and Day 29. GFAP-AGTRAP: $n = 7$ rats for Day 1, Day 8, and Day 15; $n = 3$ rats for Day 22 and Day 29 | two-way repeated measures ANOVA with Bonferroni's post hoc multiple comparisons test | Day 8            | $P = 0.5615$ |
|                          |                                                                                                                                                                                         |                                                                                      | Day 15           | $P = 0.0284$ |
|                          |                                                                                                                                                                                         |                                                                                      | Day 22           | $P > 0.9999$ |
|                          |                                                                                                                                                                                         |                                                                                      | Day 29           | $P > 0.9999$ |
| Extended Data Figure 8b  | $n = 6$ for 6 h; $n = 3$ for 24 h/FSS (-); $n = 6$ for 24 h/FSS (+)                                                                                                                     | unpaired two-tailed Student's $t$ -test                                              | 6 h              | $P = 0.0116$ |
|                          |                                                                                                                                                                                         |                                                                                      | 24 h             | $P < 0.0001$ |
| Extended Data Figure 8c  | $n = 4$ for each group                                                                                                                                                                  | unpaired two-tailed Student's $t$ -test                                              | 6 h              | $P = 0.6065$ |
|                          |                                                                                                                                                                                         |                                                                                      | 24 h             | $P = 0.6490$ |
| Extended Data Figure 8e  | $n = 3$                                                                                                                                                                                 | unpaired two-tailed Student's $t$ -test                                              |                  | $P = 0.2308$ |
| Extended Data Figure 9c  | $n = 4$ rats for PHM (-); $n = 3$ rats for PHM (+)                                                                                                                                      | unpaired two-tailed Student's $t$ -test                                              |                  | $P = 0.0064$ |
| Extended Data Figure 9e  | $n = 4$ rats for PHM (-); $n = 3$ rats for PHM (+)                                                                                                                                      | unpaired two-tailed Student's $t$ -test                                              |                  | $P = 0.0022$ |
| Extended Data Figure 10b | $n = 8$ rats for each group                                                                                                                                                             | two-way repeated measures ANOVA with Bonferroni's post hoc multiple comparisons test | Day 15           | $P > 0.9999$ |
|                          |                                                                                                                                                                                         |                                                                                      | Day 22           | $P > 0.9999$ |
|                          |                                                                                                                                                                                         |                                                                                      | Day 29           | $P > 0.9999$ |
| Extended Data Figure 10c | $n = 8$ rats for each group                                                                                                                                                             | unpaired two-tailed Student's $t$ -test                                              |                  | $P = 0.9167$ |
| Extended Data Figure 10e | $n = 3$ rats for each group                                                                                                                                                             | unpaired two-tailed Student's $t$ -test                                              |                  | $P = 0.0173$ |
| Extended Data Figure 10f | $n = 3$ rats for each group                                                                                                                                                             | unpaired two-tailed Student's $t$ -test                                              |                  | $P = 0.7812$ |

| Figure                  | $n$                         | Statistical test                        | $P$ -value   |
|-------------------------|-----------------------------|-----------------------------------------|--------------|
| Supplementary Figure 1d | $n = 3$ rats for each group | unpaired two-tailed Student's $t$ -test | $P = 0.8226$ |
| Supplementary Figure 1f | $n = 3$ rats for each group | unpaired two-tailed Student's $t$ -test | $P = 0.2342$ |

|                         |                                                                                                                        |                                                                             |                            |              |
|-------------------------|------------------------------------------------------------------------------------------------------------------------|-----------------------------------------------------------------------------|----------------------------|--------------|
| Supplementary Figure 2b | $n = 7$ rats for treadmill (-)/Gel (-); $n = 6$ rats for treadmill (+)/Gel (-); $n = 4$ rats for each group of Gel (+) | two-way repeated measures ANOVA with Bonferroni's post hoc comparisons test | black vs. blue for Day 15  | $P > 0.9999$ |
|                         |                                                                                                                        |                                                                             | black vs. blue for Day 22  | $P = 0.0001$ |
|                         |                                                                                                                        |                                                                             | black vs. blue for Day 29  | $P = 0.0004$ |
|                         |                                                                                                                        |                                                                             | gray vs. orange for Day 15 | $P > 0.9999$ |
|                         |                                                                                                                        |                                                                             | gray vs. orange for Day 22 | $P > 0.9999$ |
|                         |                                                                                                                        |                                                                             | gray vs. orange for Day 29 | $P > 0.9999$ |
| Supplementary Figure 2c | $n = 7$ rats for treadmill (-)/Gel (-); $n = 6$ rats for treadmill (+)/Gel (-); $n = 4$ rats for each group of Gel (+) | one-way ANOVA with Tukey's post hoc multiple comparisons test               | column 1 vs. 2             | $P = 0.0015$ |
|                         |                                                                                                                        |                                                                             | column 3 vs. 4             | $P = 0.9997$ |
|                         |                                                                                                                        |                                                                             | column 1 vs. 3             | $P = 0.7751$ |
| Supplementary Figure 3b | $n = 3$ rats for each group                                                                                            | unpaired two-tailed Student's $t$ -test                                     |                            | $P = 0.6518$ |
| Supplementary Figure 3c | $n = 3$ rats for each group                                                                                            | unpaired two-tailed Student's $t$ -test                                     |                            | $P = 0.6943$ |
| Supplementary Figure 3d | $n = 3$ rats for each group                                                                                            | unpaired two-tailed Student's $t$ -test                                     |                            | $P = 0.7938$ |
| Supplementary Figure 3e | $n = 3$ rats for each group                                                                                            | unpaired two-tailed Student's $t$ -test                                     |                            | $P = 0.8722$ |
| Supplementary Figure 3f | $n = 3$ rats for each group                                                                                            | unpaired two-tailed Student's $t$ -test                                     |                            | $P = 0.1679$ |
| Supplementary Figure 3g | $n = 3$ rats for each group                                                                                            | unpaired two-tailed Student's $t$ -test                                     |                            | $P = 0.7247$ |
| Supplementary Figure 3h | $n = 5$ rats for each group                                                                                            | unpaired two-tailed Student's $t$ -test                                     | for TNF- $\alpha$          | $P = 0.2312$ |
|                         |                                                                                                                        |                                                                             | for IL-1 $\beta$           | $P = 0.9342$ |
| Supplementary Figure 3i | $n = 5$ rats for each group                                                                                            | unpaired two-tailed Student's $t$ -test                                     |                            | $P = 0.8433$ |
| Supplementary Figure 4b | $n = 5$ rats                                                                                                           | one-way repeated measures ANOVA with Dunnett's multiple comparisons test    | SBP for beat 1             | $P = 0.5829$ |
|                         |                                                                                                                        |                                                                             | SBP for beat 2             | $P = 0.9994$ |
|                         |                                                                                                                        |                                                                             | SBP for beat 3             | $P = 0.9627$ |
|                         |                                                                                                                        |                                                                             | SBP for beat 4             | $P = 0.4169$ |
|                         |                                                                                                                        |                                                                             | SBP for beat 5             | $P = 0.6948$ |
|                         |                                                                                                                        |                                                                             | SBP for beat 6             | $P = 0.9999$ |
|                         |                                                                                                                        |                                                                             | SBP for beat 7             | $P = 0.8152$ |
|                         |                                                                                                                        |                                                                             | SBP for beat 8             | $P = 0.1381$ |
|                         |                                                                                                                        |                                                                             | SBP for beat 9             | $P = 0.3191$ |
|                         |                                                                                                                        |                                                                             | SBP for beat 10            | $P = 0.5286$ |
|                         |                                                                                                                        |                                                                             | MAP for beat 1             | $P = 0.9906$ |
|                         |                                                                                                                        |                                                                             | MAP for beat 2             | $P > 0.9999$ |
|                         |                                                                                                                        |                                                                             | MAP for beat 3             | $P = 0.9997$ |
|                         |                                                                                                                        |                                                                             | MAP for beat 4             | $P = 0.9997$ |
| MAP for beat 5          | $P = 0.9349$                                                                                                           |                                                                             |                            |              |

|                 |              |
|-----------------|--------------|
| MAP for beat 6  | $P = 0.3562$ |
| MAP for beat 7  | $P = 0.2239$ |
| MAP for beat 8  | $P = 0.1599$ |
| MAP for beat 9  | $P = 0.3001$ |
| MAP for beat 10 | $P = 0.2596$ |
| DBP for beat 1  | $P = 0.9810$ |
| DBP for beat 2  | $P > 0.9999$ |
| DBP for beat 3  | $P > 0.9999$ |
| DBP for beat 4  | $P > 0.9999$ |
| DBP for beat 5  | $P = 0.9996$ |
| DBP for beat 6  | $P = 0.9997$ |
| DBP for beat 7  | $P = 0.9421$ |
| DBP for beat 8  | $P = 0.5327$ |
| DBP for beat 9  | $P = 0.4949$ |
| DBP for beat 10 | $P = 0.5215$ |
| HR for beat 1   | $P = 0.8547$ |
| HR for beat 2   | $P = 0.7825$ |
| HR for beat 3   | $P = 0.8267$ |
| HR for beat 4   | $P = 0.6800$ |
| HR for beat 5   | $P = 0.9996$ |
| HR for beat 6   | $P = 0.9834$ |
| HR for beat 7   | $P = 0.8658$ |
| HR for beat 8   | $P = 0.9460$ |
| HR for beat 9   | $P = 0.4602$ |
| HR for beat 10  | $P = 0.8992$ |
| ADNA for beat 1 | $P = 0.6663$ |
| ADNA for beat 2 | $P = 0.9996$ |
| ADNA for beat 3 | $P = 0.9258$ |
| ADNA for beat 4 | $P = 0.8960$ |
| ADNA for beat 5 | $P = 0.9211$ |
| ADNA for beat 6 | $P = 0.4492$ |
| ADNA for beat 7 | $P = 0.3520$ |
| ADNA for beat 8 | $P = 0.9995$ |

|                         |                                                                                                                                                                        |                                    |                  |              |
|-------------------------|------------------------------------------------------------------------------------------------------------------------------------------------------------------------|------------------------------------|------------------|--------------|
|                         |                                                                                                                                                                        |                                    | ADNA for beat 9  | $P = 0.9979$ |
|                         |                                                                                                                                                                        |                                    | ADNA for beat 10 | $P = 0.5181$ |
| Supplementary Figure 5d | $n = 5$                                                                                                                                                                | paired two-tailed Student's t-test | SBP              | $P = 0.0018$ |
|                         |                                                                                                                                                                        |                                    | DBP              | $P = 0.1509$ |
|                         |                                                                                                                                                                        |                                    | MAP              | $P = 0.0459$ |
|                         |                                                                                                                                                                        |                                    | HR               | $P = 0.3900$ |
| Supplementary Figure 6b | $n = 15$                                                                                                                                                               | paired two-tailed Student's t-test | Aldosterone      | $P = 0.6265$ |
|                         |                                                                                                                                                                        |                                    | Renin activity   | $P = 0.3794$ |
|                         |                                                                                                                                                                        |                                    | Epinephrine      | $P = 0.5103$ |
|                         |                                                                                                                                                                        |                                    | Norepinephrine   | $P = 0.2653$ |
|                         |                                                                                                                                                                        |                                    | Dopamine         | $P > 0.9999$ |
|                         |                                                                                                                                                                        |                                    | CRP              | $P = 0.4412$ |
| Supplementary Figure 7b | $n = 15$ for Pre and Weeks 1 to 5; $n = 13$ for Week 6; $n = 12$ for Week 7; $n = 11$ for Weeks 8 and 9; $n = 9$ for Week 10; $n = 7$ for Week 11; $n = 3$ for Week 12 | paired two-tailed Student's t-test | Male, SBP        | $P = 0.0033$ |
|                         |                                                                                                                                                                        |                                    | Male, DBP        | $P = 0.0094$ |
|                         |                                                                                                                                                                        |                                    | Male, MAP        | $P = 0.0046$ |
|                         |                                                                                                                                                                        |                                    | Male, HR         | $P = 0.4373$ |
|                         |                                                                                                                                                                        |                                    | Female, SBP      | $P = 0.0002$ |
|                         |                                                                                                                                                                        |                                    | Female, DBP      | $P = 0.0005$ |
|                         |                                                                                                                                                                        |                                    | Female, MAP      | $P = 0.0003$ |
|                         |                                                                                                                                                                        |                                    | Female, HR       | $P = 0.6257$ |
